# Supplementary material for: Inductively coupled plasma optical emission spectroscopic determination of trace rare earth elements in highly refractory gadolinium zirconate (Gd 2 Zr 2 O 7 )
Source: Royal Society of Chemistry journal article supplement (doi:10.1039/d4ra05017g), 2024-01-01
Supplement: d4ra05017g1.pdf [file d4ra05017g1.pdf]

**Supporting information**

**Inductively coupled plasma optical emission spectroscopic determination of trace rare earth elements in highly refractory gadolinium zirconate ( $Gd_2Zr_2O_7$ )**

Abhijit Saha\*, Khushboo Kumari, Sadhan Bijoy Deb\* and Manoj Kumar Saxena

Radioanalytical Chemistry Division, Bhabha Atomic Research Centre, Mumbai, India 400085

\*Corresponding authors Email id: abhi.gallery@gmail.com (A. Saha)

sbdeb@barc.gov.in (S.B. Deb)

| <b>Table of contents</b>                                                                                                          | <b>Page no.</b> |
|-----------------------------------------------------------------------------------------------------------------------------------|-----------------|
| <b>Table T1</b> Preparation of synthetic standard solutions of $Gd_2Zr_2O_7$                                                      | S3              |
| <b>Table T2</b> Selection of optical emission lines of thirteen lanthanides                                                       | S4              |
| <b>Table T3</b> Analysis of synthetic standards (N = 5)                                                                           | S5              |
| <b>Table T4</b> List of the Gd emission lines responsible for high background counts for few rare earth elements                  | S6              |
| <b>Fig. S1(a-m)</b> Calibration spectra of all thirteen lanthanides                                                               | S7-S9           |
| <b>Fig. S2</b> WDXRF spectrum of $ZrO_2$                                                                                          | S10             |
| <b>Fig. S3</b> WDXRF spectrum of $Gd_2O_3$                                                                                        | S11             |
| <b>Fig. S4(a-m)</b> Emission spectra of all thirteen lanthanides in absence and presence of $516 \text{ mg L}^{-1}$ of Gd matrix  | S12-S24         |
| <b>Fig. S5(a-m)</b> Emission spectra of all thirteen lanthanides in absence and presence of $1032 \text{ mg L}^{-1}$ of Gd matrix | S25-S37         |

**Table T1:**

Synthetic standard set of G1 was prepared by considering dissolution of 50 mg of  $Gd_2Zr_2O_7$  sample in 100 mL solution.

Synthetic standard set of G2 was prepared by considering dissolution of 100 mg of  $Gd_2Zr_2O_7$  sample in 100 mL solution.

Synthetic standard set of G3 was prepared by considering dissolution of 200 mg of  $Gd_2Zr_2O_7$  sample in 100 mL solution.

| Element              | Synthetic standard set G1 (mg L <sup>-1</sup> ) |      |      | Synthetic standard set G2 (mg L <sup>-1</sup> ) |      |      | Synthetic standard set G3 (mg L <sup>-1</sup> ) |      |      |
|----------------------|-------------------------------------------------|------|------|-------------------------------------------------|------|------|-------------------------------------------------|------|------|
|                      | G1A                                             | G1B  | G1C  | G2A                                             | G2B  | G2C  | G3A                                             | G3B  | G3C  |
| Gd <sub>matrix</sub> | 258                                             | 258  | 258  | 516                                             | 516  | 516  | 1032                                            | 1032 | 1032 |
| Zr <sub>matrix</sub> | 150                                             | 150  | 150  | 300                                             | 300  | 300  | 600                                             | 600  | 600  |
| La                   | 0.25                                            | 1.0  | 2.5  | 1.0                                             | 2.5  | 0.25 | 2.5                                             | 0.25 | 1.0  |
| Ce                   | 1.0                                             | 2.5  | 0.25 | 2.5                                             | 0.25 | 1.0  | 0.25                                            | 1.0  | 2.5  |
| Pr                   | 2.5                                             | 0.25 | 1.0  | 0.25                                            | 1.0  | 2.5  | 1.0                                             | 2.5  | 0.25 |
| Nd                   | 1.0                                             | 2.5  | 0.25 | 2.5                                             | 0.25 | 1.0  | 0.25                                            | 1.0  | 2.5  |
| Sm                   | 2.5                                             | 0.25 | 1.0  | 0.25                                            | 1.0  | 2.5  | 1.0                                             | 2.5  | 0.25 |
| Eu                   | 0.25                                            | 1.0  | 2.5  | 1.0                                             | 2.5  | 0.25 | 2.5                                             | 0.25 | 1.0  |
| Tb                   | 2.5                                             | 0.25 | 1.0  | 0.25                                            | 1.0  | 2.5  | 1.0                                             | 2.5  | 0.25 |
| Dy                   | 0.25                                            | 1.0  | 2.5  | 1.0                                             | 2.5  | 0.25 | 2.5                                             | 0.25 | 1.0  |
| Ho                   | 1.0                                             | 2.5  | 0.25 | 2.5                                             | 0.25 | 1.0  | 0.25                                            | 1.0  | 2.5  |
| Er                   | 0.25                                            | 1.0  | 2.5  | 1.0                                             | 2.5  | 0.25 | 2.5                                             | 0.25 | 1.0  |
| Tm                   | 1.0                                             | 2.5  | 0.25 | 2.5                                             | 0.25 | 1.0  | 0.25                                            | 1.0  | 2.5  |
| Yb                   | 2.5                                             | 0.25 | 1.0  | 0.25                                            | 1.0  | 2.5  | 1.0                                             | 2.5  | 0.25 |
| Lu                   | 0.25                                            | 1.0  | 2.5  | 1.0                                             | 2.5  | 0.25 | 2.5                                             | 0.25 | 1.0  |

**Table T2:**

| <b>Element</b> | <b>Emission line (nm)</b> | <b>Interference from Gd emission line (nm)</b> | <b>Interference from Zr emission line (nm)</b> |
|----------------|---------------------------|------------------------------------------------|------------------------------------------------|
| La             | 412.323                   | Not present                                    | 412.338                                        |
| Ce             | 418.66                    | Not present                                    | 418.669                                        |
| Pr             | 417.939                   | Not present                                    | 417.981                                        |
| Nd             | 401.225                   | Not present                                    | 401.225                                        |
| Sm             | 388.529                   | Not present                                    | 388.542                                        |
| Eu             | 381.967                   | Not present                                    | 381.984                                        |
| Tb             | 332.44                    | Not present                                    | Not present                                    |
| Dy             | 353.17                    | Not present                                    | Not present                                    |
| Ho             | 345.6                     | Not present                                    | 345.591                                        |
| Er             | 337.271                   | Not present                                    | Not present                                    |
| Tm             | 313.125                   | 313.081                                        | 313.111                                        |
| Yb             | 328.937                   | 328.915                                        | Not present                                    |
| Lu             | 261.542                   | Not present                                    | 261.559                                        |

**Table T3:**

| Elements | G1 (mg L <sup>-1</sup> ) |                      |                      | G2 (mg L <sup>-1</sup> ) |                      |                      | G3 (mg L <sup>-1</sup> ) |                     |                     |
|----------|--------------------------|----------------------|----------------------|--------------------------|----------------------|----------------------|--------------------------|---------------------|---------------------|
|          | G1A                      | G1B                  | G1C                  | G2A                      | G2B                  | G2C                  | G3A                      | G3B                 | G3C                 |
| La       | 0.245±0.005<br>(98)      | 0.98±0.01<br>(98)    | 2.40±0.04<br>(96)    | 1.00±0.02<br>(100)       | 2.44±0.03<br>(98)    | 0.248±0.004<br>(99)  | 2.38±0.05<br>(95)        | 0.235±0.006<br>(94) | 0.93±0.02<br>(93)   |
| Ce       | 0.99±0.01<br>(99)        | 2.42±0.05<br>(97)    | 0.252±0.005<br>(101) | 2.45±0.04<br>(98)        | 0.251±0.005<br>(100) | 0.96±0.02<br>(96)    | 0.213±0.003<br>(85)      | 0.92±0.02<br>(88)   | 2.20±0.06<br>(88)   |
| Pr       | 2.45±0.04<br>(98)        | 0.242±0.004<br>(97)  | 0.95±0.02<br>(95)    | 0.245±0.04<br>(98)       | 0.98±0.02<br>(98)    | 2.40±0.05<br>(96)    | 0.86±0.04<br>(86)        | 2.23±0.06<br>(89)   | 0.211±0.006<br>(84) |
| Nd       | 0.96±0.02<br>(96)        | 2.39±0.04<br>(96)    | 0.244±0.004<br>(98)  | 2.40±0.04<br>(96)        | 0.248±0.003<br>(99)  | 0.97±0.02<br>(97)    | 0.213±0.006<br>(85)      | 0.87±0.03<br>(87)   | 2.23±0.07<br>(89)   |
| Sm       | 2.44±0.04<br>(98)        | 0.238±0.003<br>(95)  | 0.96±0.01<br>(96)    | 0.239±0.004<br>(96)      | 0.97±0.02<br>(97)    | 2.46±0.05<br>(98)    | 0.87±0.03<br>(87)        | 2.20±0.05<br>(88)   | 0.212±0.006<br>(85) |
| Eu       | 0.250±0.004<br>(100)     | 0.97±0.02<br>(97)    | 2.52±0.05<br>(101)   | 0.96±0.02<br>(96)        | 2.49±0.05<br>(100)   | 0.245±0.004<br>(98)  | 2.30±0.06<br>(92)        | 0.225±0.006<br>(90) | 0.90±0.03<br>(90)   |
| Tb       | 2.41±0.04<br>(96)        | 0.245±0.005<br>(98)  | 0.95±0.01<br>(95)    | 0.243±0.002<br>(97)      | 0.98±0.01<br>(100)   | 2.44±0.04<br>(98)    | 0.84±0.02<br>(84)        | 2.04±0.06<br>(82)   | 0.210±0.006<br>(84) |
| Dy       | 0.248±0.003<br>(99)      | 1.02±0.02<br>(102)   | 2.46±0.04<br>(98)    | 0.95±0.01<br>(95)        | 2.40±0.04<br>(96)    | 0.242±0.003<br>(97)  | 2.30±0.05<br>(92)        | 0.220±0.005<br>(88) | 0.90±0.03<br>(90)   |
| Ho       | 0.99±0.01<br>(99)        | 2.48±0.03<br>(99)    | 0.254±0.003<br>(102) | 2.40±0.03<br>(96)        | 0.239±0.004<br>(96)  | 0.98±0.01<br>(98)    | 0.202±0.007<br>(81)      | 0.85±0.04<br>(85)   | 2.16±0.06<br>(86)   |
| Er       | 0.248±0.004<br>(99)      | 0.97±0.02<br>(97)    | 2.50±0.05<br>(100)   | 0.96±0.01<br>(96)        | 2.46±0.04<br>(98)    | 0.247±0.003<br>(99)  | 2.43±0.05<br>(97)        | 0.226±0.005<br>(90) | 0.91±0.03<br>(91)   |
| Tm       | 1.01±0.02<br>(101)       | 2.49±0.04<br>(100)   | 0.249±0.005<br>(100) | 2.52±0.05<br>(101)       | 0.249±0.004<br>(100) | 0.98±0.01<br>(98)    | 0.240±0.005<br>(96)      | 0.95±0.02<br>(95)   | 2.43±0.05<br>(97)   |
| Yb       | 2.47±0.04<br>(99)        | 0.250±0.003<br>(100) | 1.00±0.01<br>(100)   | 0.250±0.003<br>(100)     | 0.99±0.02<br>(99)    | 2.45±0.04<br>(98)    | 0.88±0.03<br>(88)        | 2.31±0.05<br>(92)   | 0.221±0.005<br>(88) |
| Lu       | 0.248±0.004<br>(99)      | 0.99±0.01<br>(99)    | 2.53±0.05<br>(101)   | 0.99±0.01<br>(99)        | 2.48±0.04<br>(99)    | 0.250±0.005<br>(100) | 2.42±0.006<br>(97)       | 0.240±0.004<br>(96) | 0.95±0.02<br>(95)   |

Note: The percentage recoveries are given in parenthesis.

**Table T4:**

| <b>Element</b> | <b>Emission line (nm)</b> | <b>Interference from nearby Gd emission line(s) (nm)</b> |
|----------------|---------------------------|----------------------------------------------------------|
| Ce             | 418.66                    | 418.425                                                  |
| Pr             | 417.939                   | 417.356                                                  |
| Nd             | 401.225                   | 401.38                                                   |
| Sm             | 388.529                   | 388.184                                                  |
| Tb             | 332.44                    | 332.044 and 332.934                                      |
| Ho             | 345.6                     | 345.038, 345.23, 345.414 and 345.49                      |

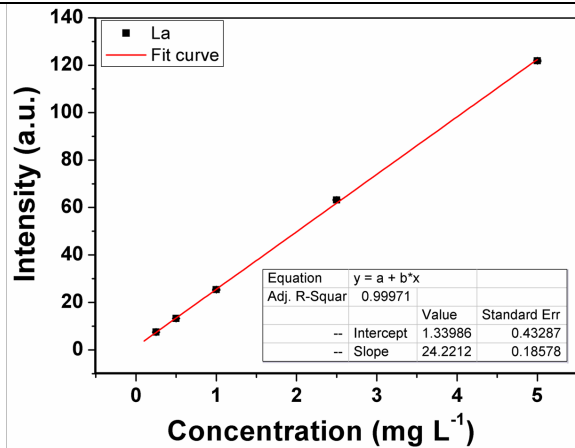

Fig. S1(a)

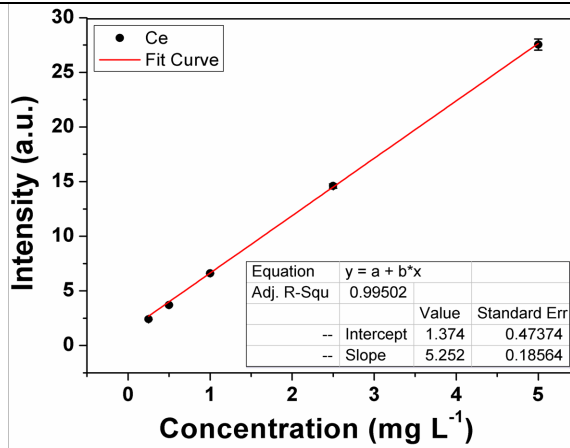

Fig. S1(b)

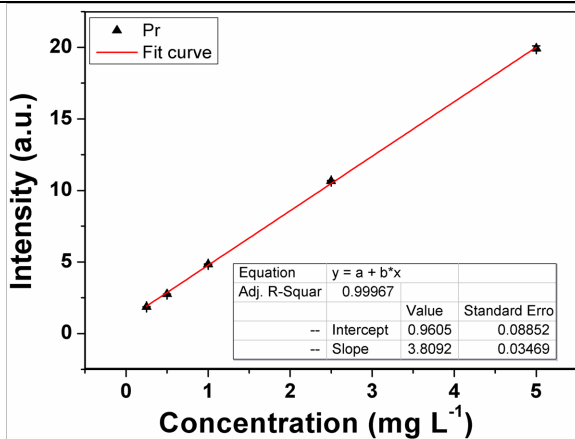

Fig. S1(c)

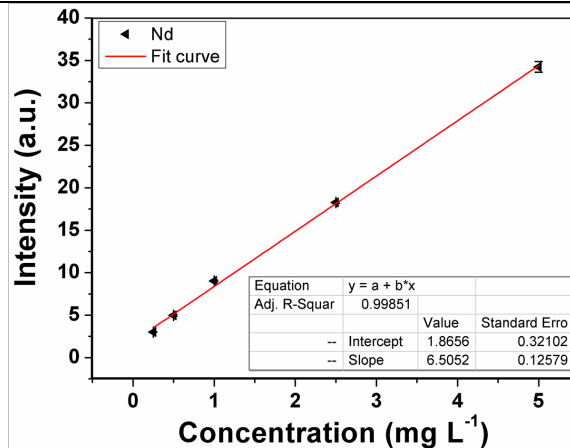

Fig. S1(d)

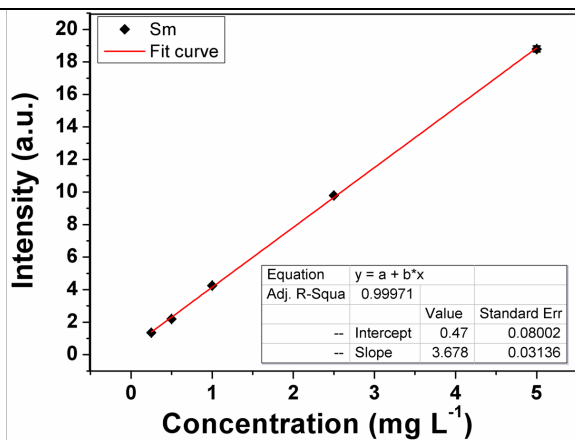

Fig. S1(e)

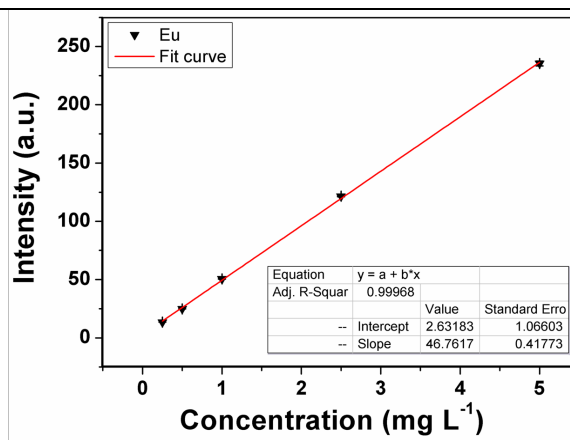

Fig. S1(f)

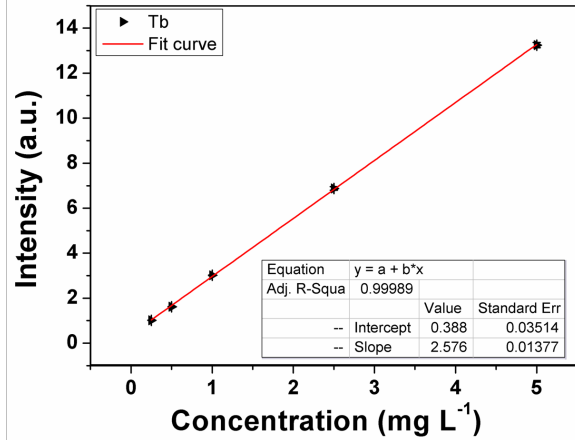

Fig. S1(g)

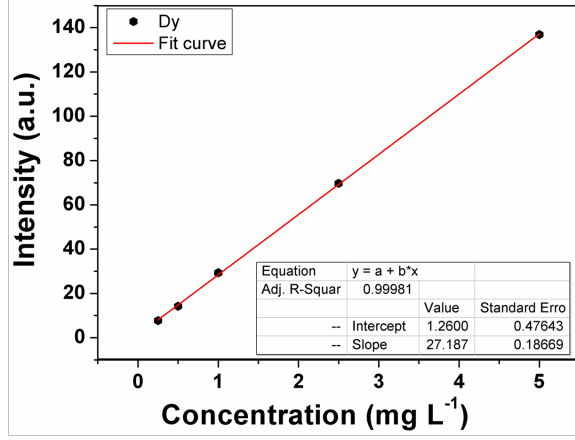

Fig. S1(h)

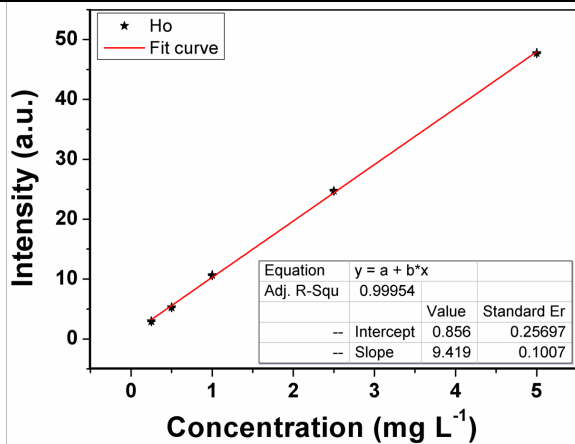

Fig. S1(i)

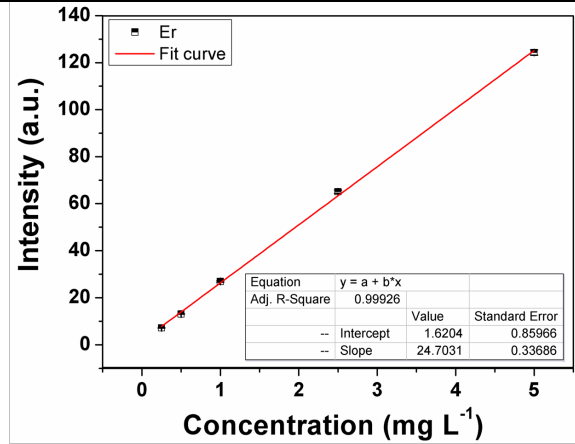

Fig. S1(j)

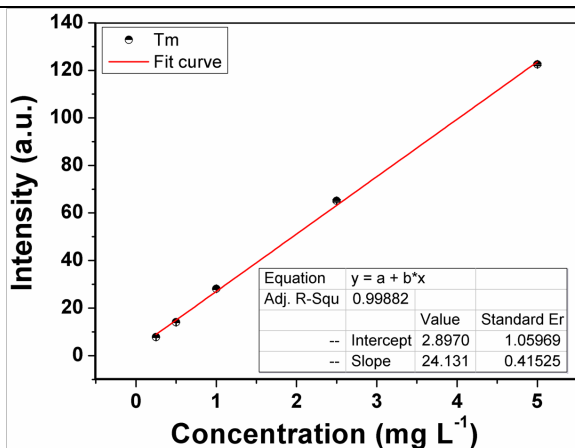

Fig. S1(k)

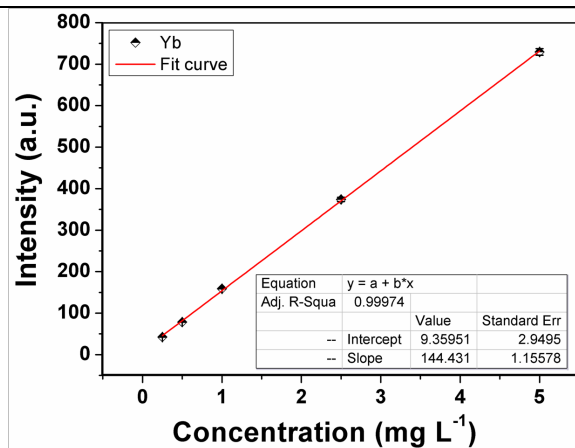

Fig. S1(l)



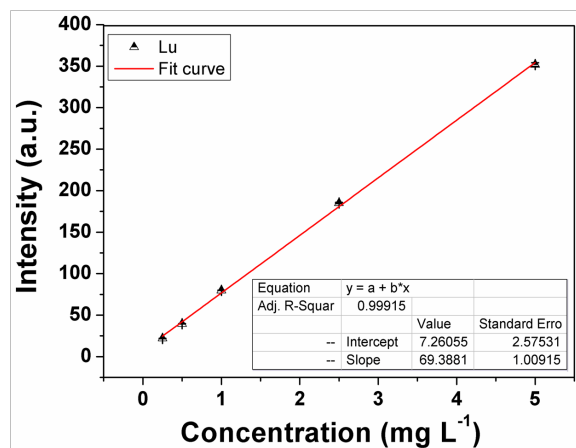

**Fig. S1(m)**

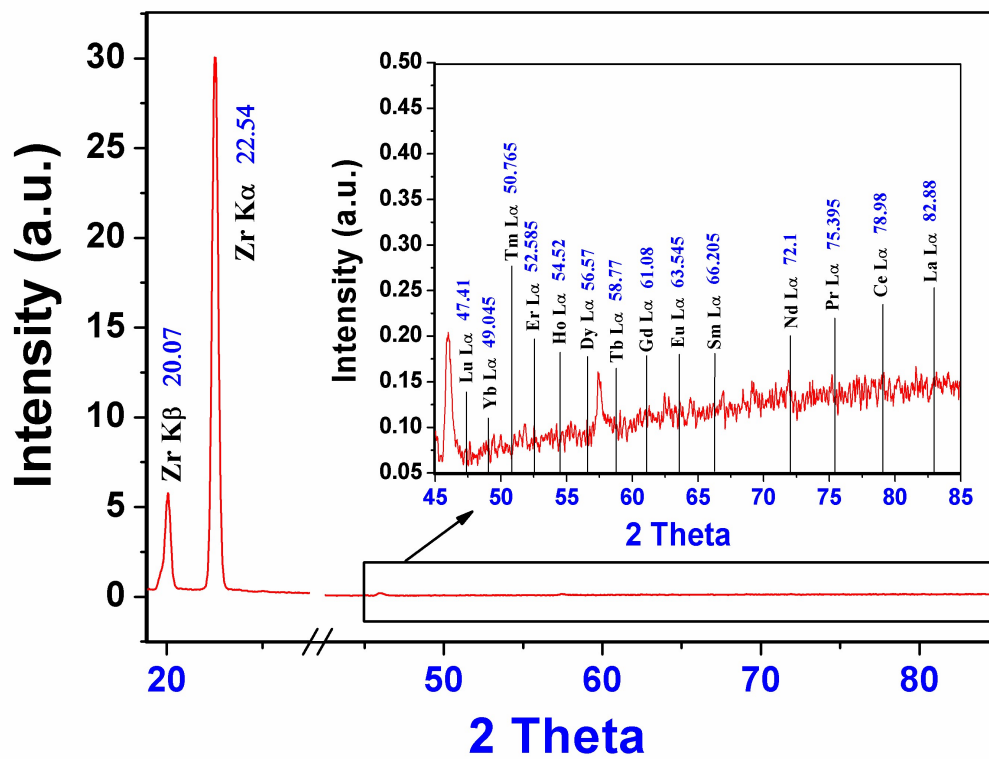

Fig. S2

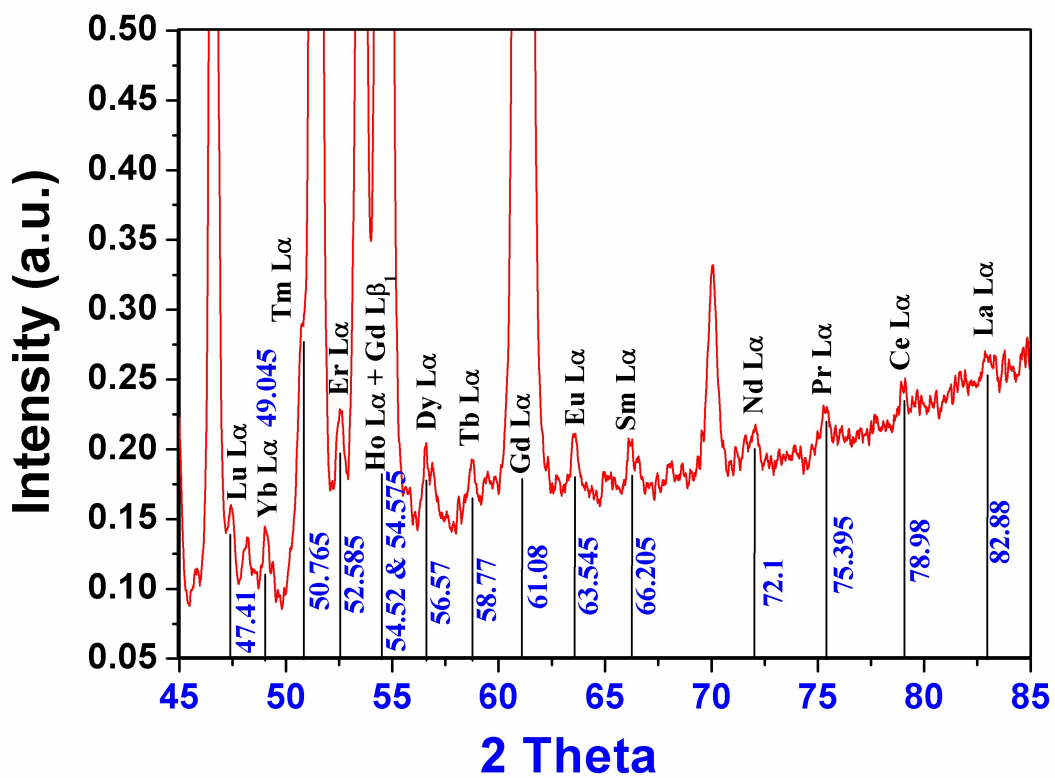

Fig. S3

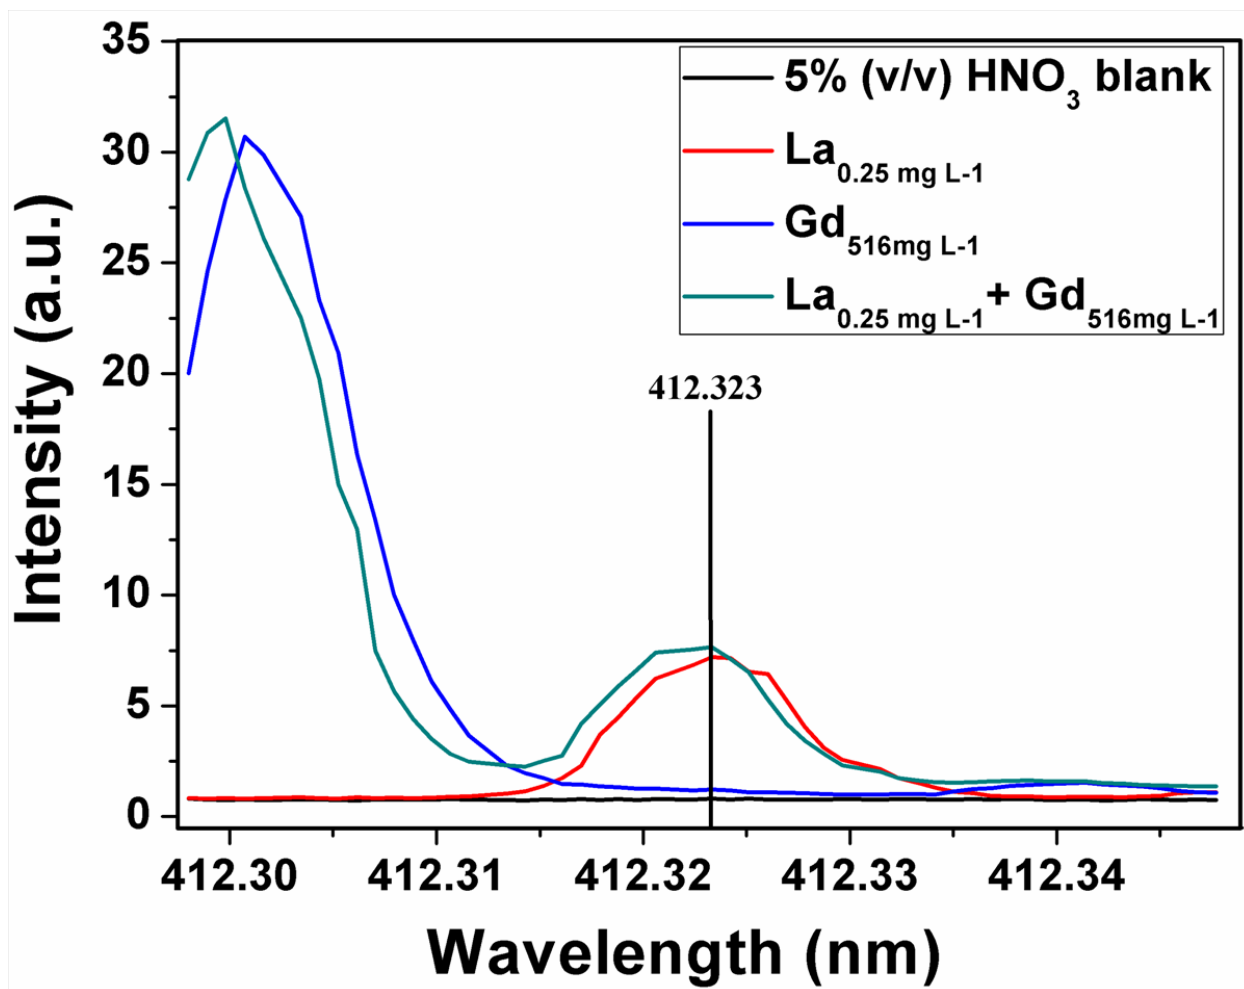

Fig. S4(a)

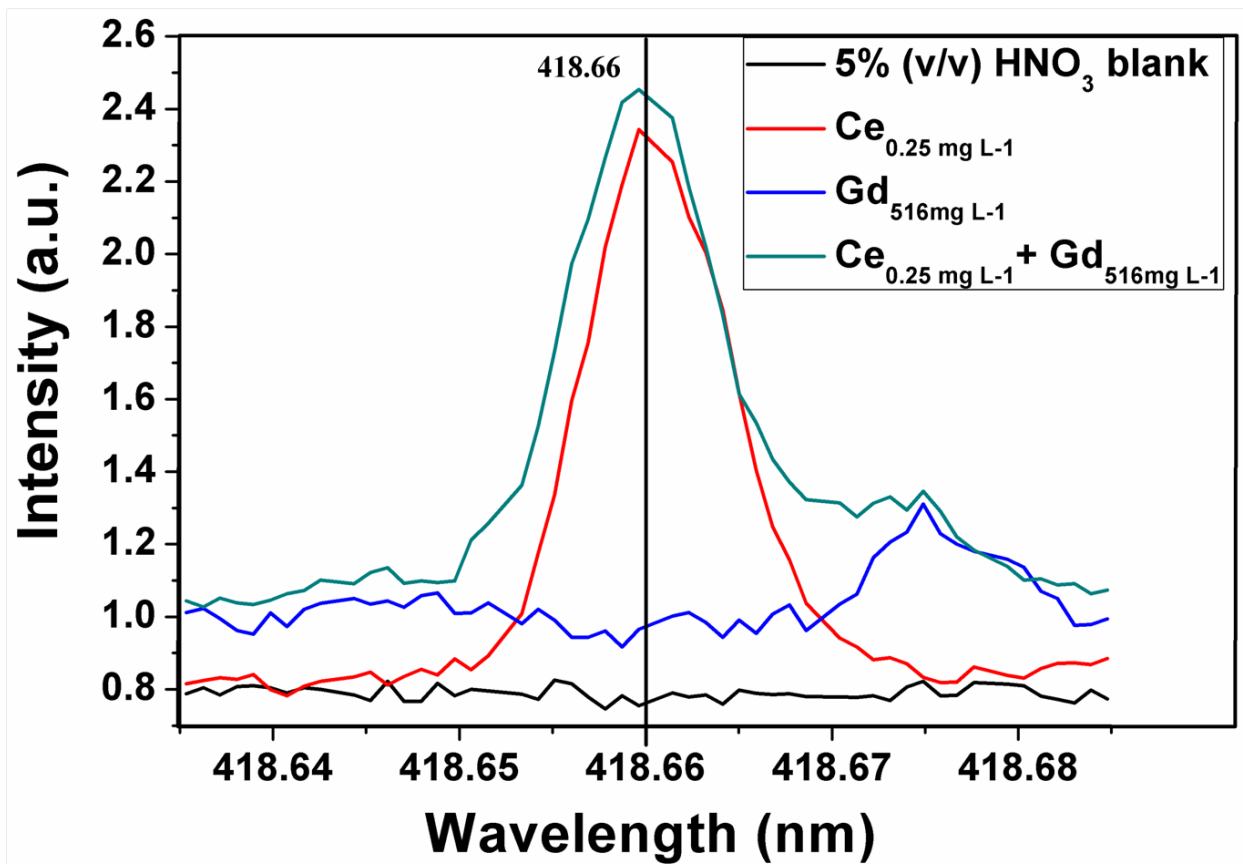

Fig. S4(b)

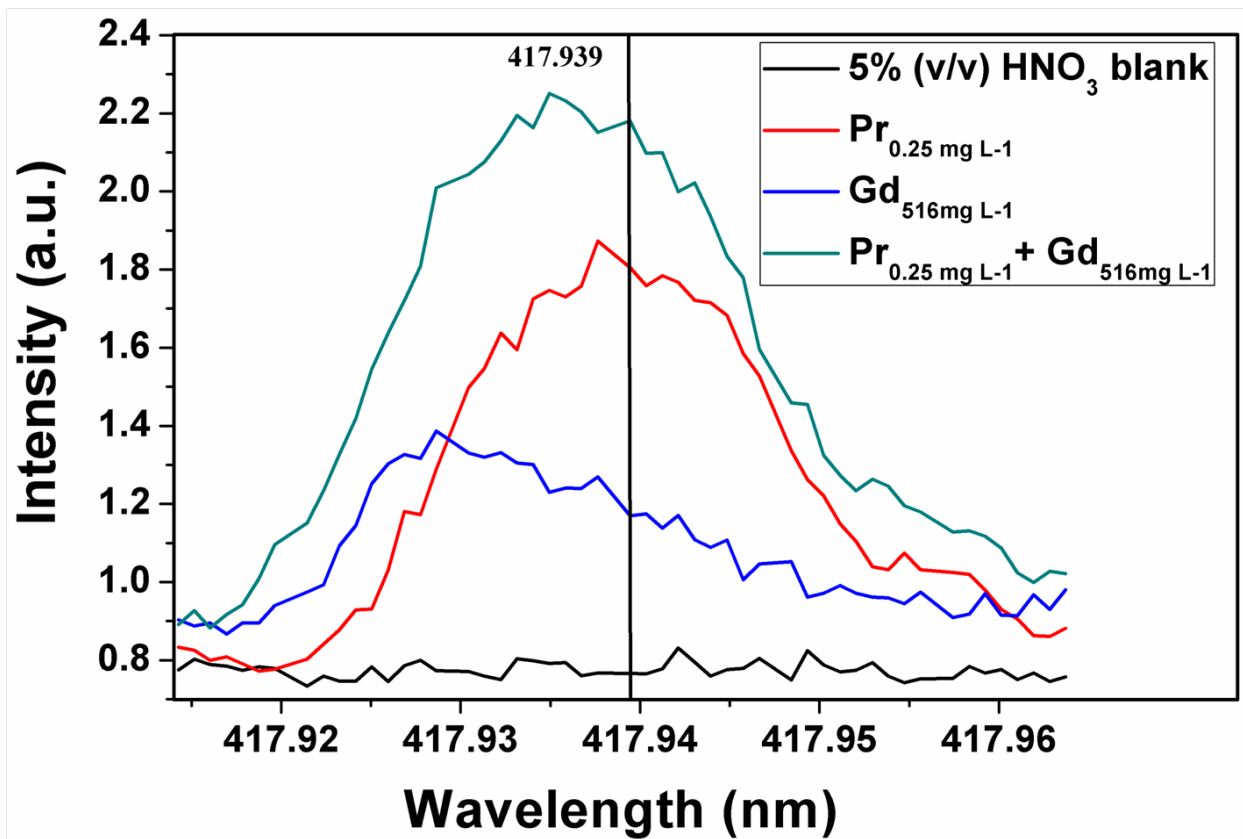

Fig. S4(c)

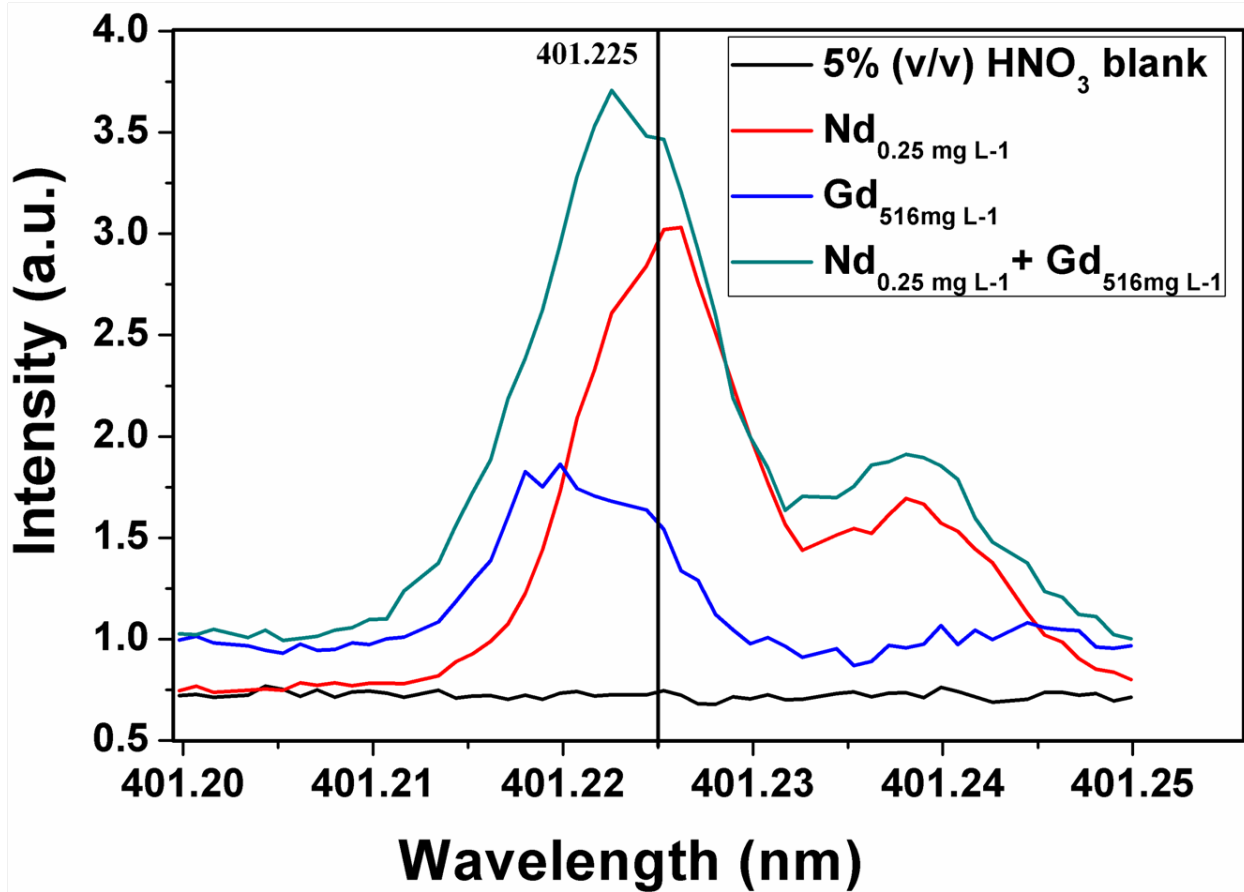

Fig. S4(d)

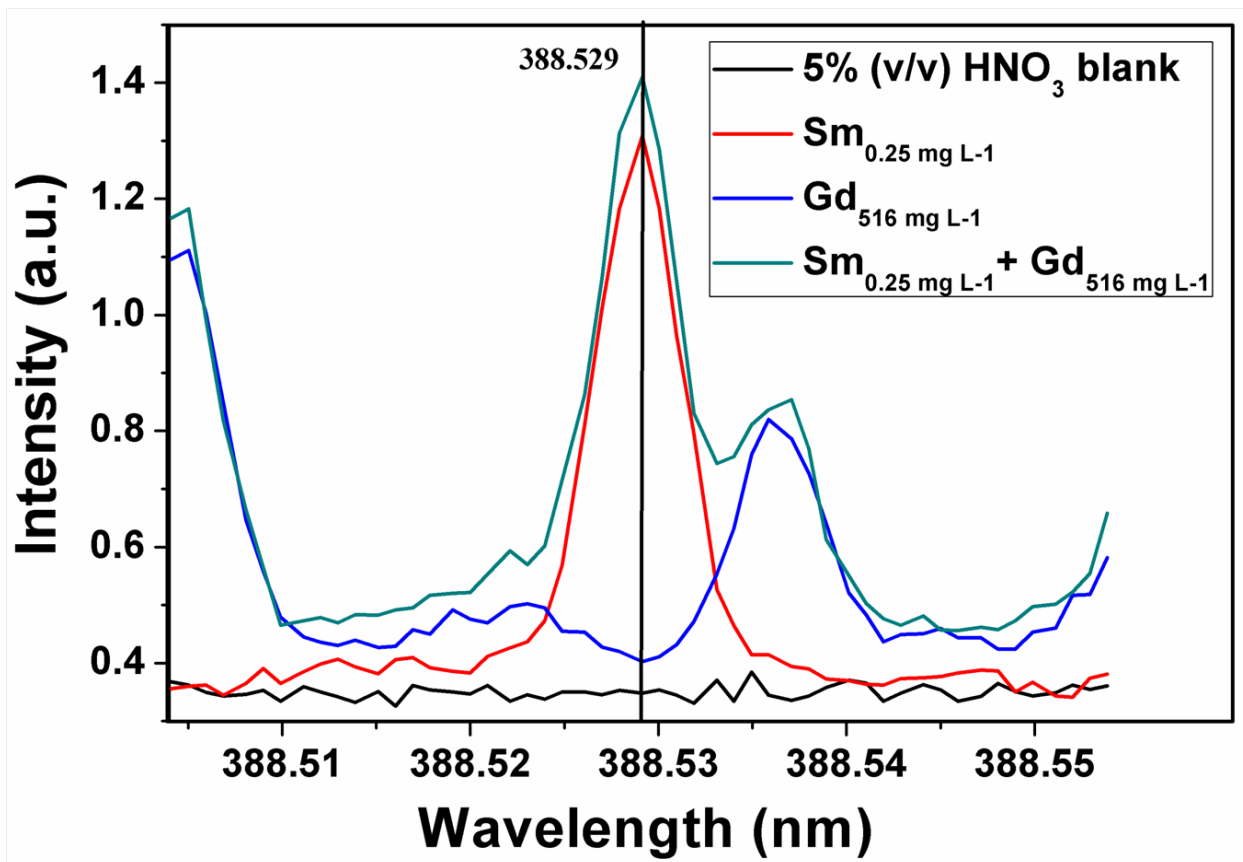

Fig. S4(e)



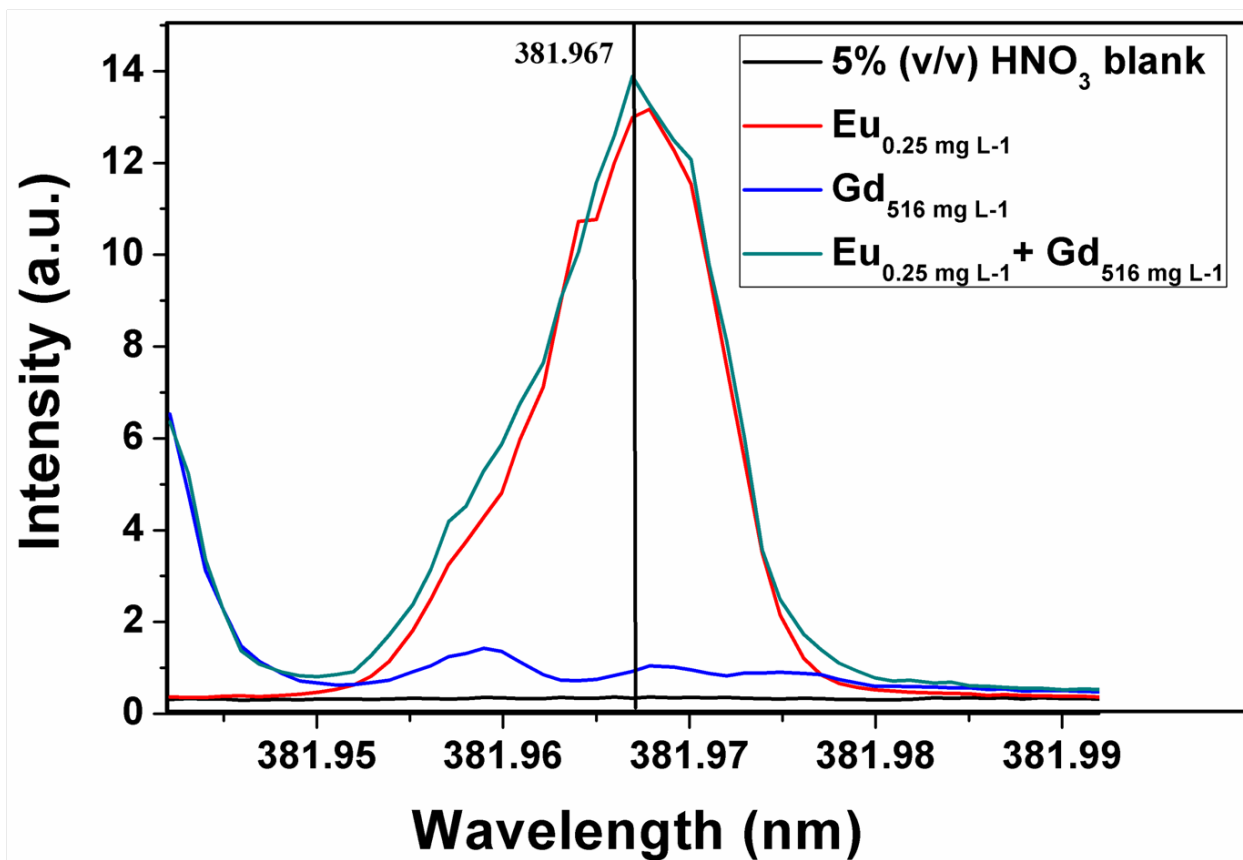

Fig. S4(f)

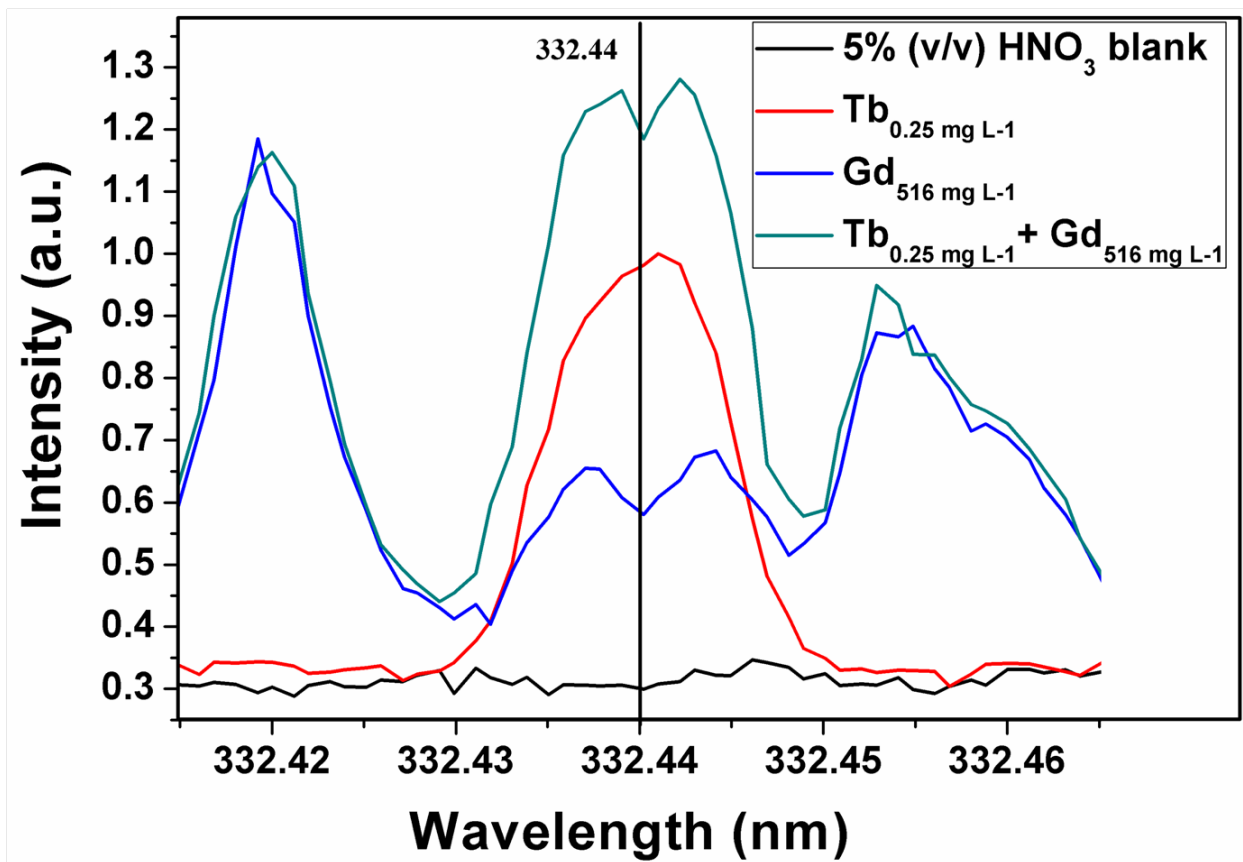

Fig. S4(g)

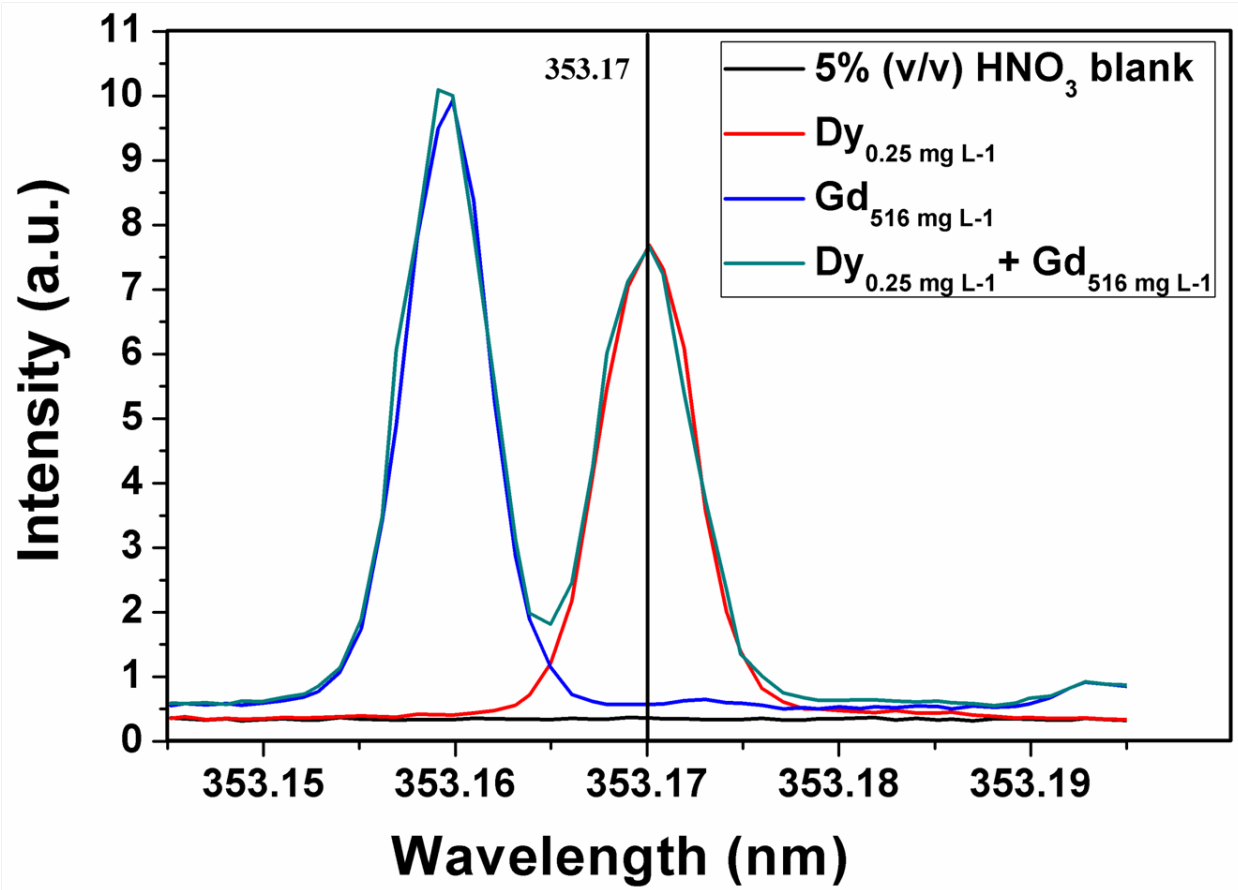

Fig. S4(h)

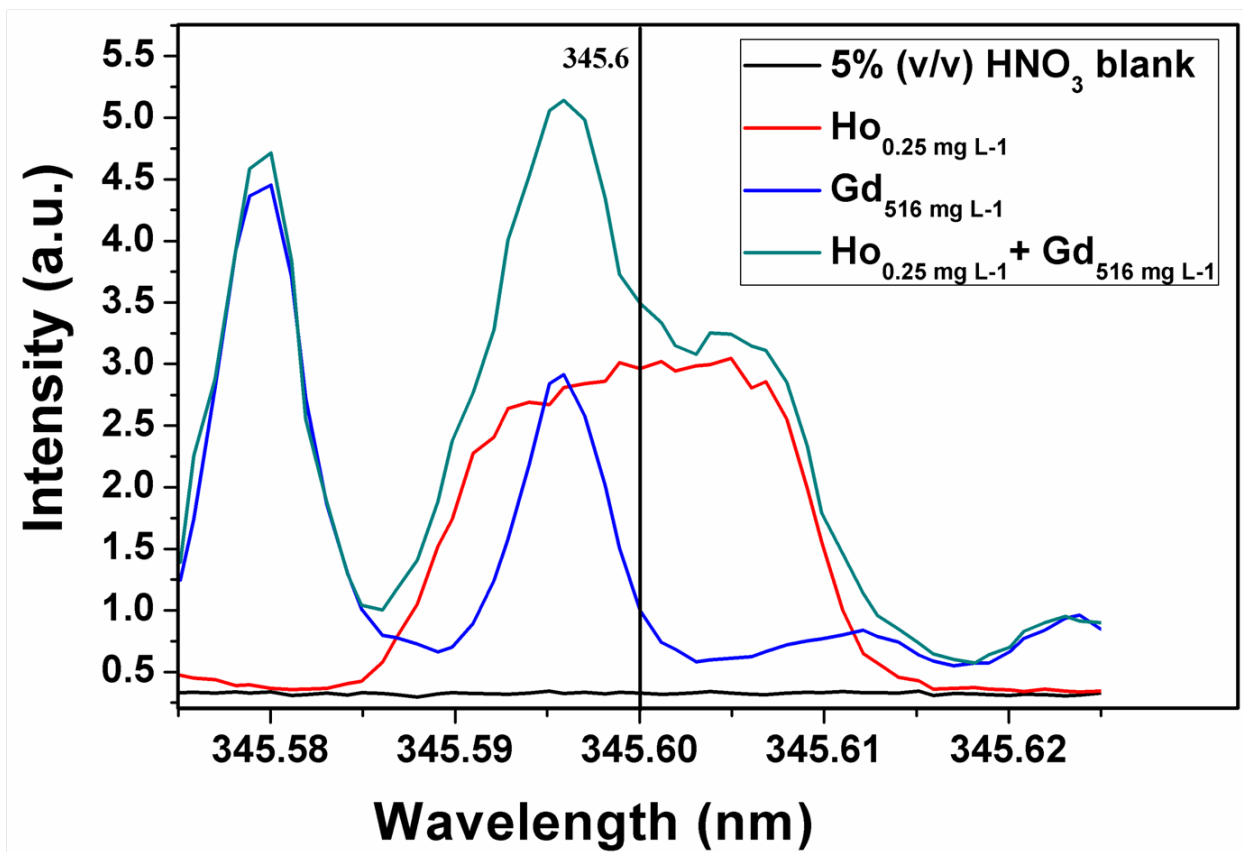

Fig. S4(i)

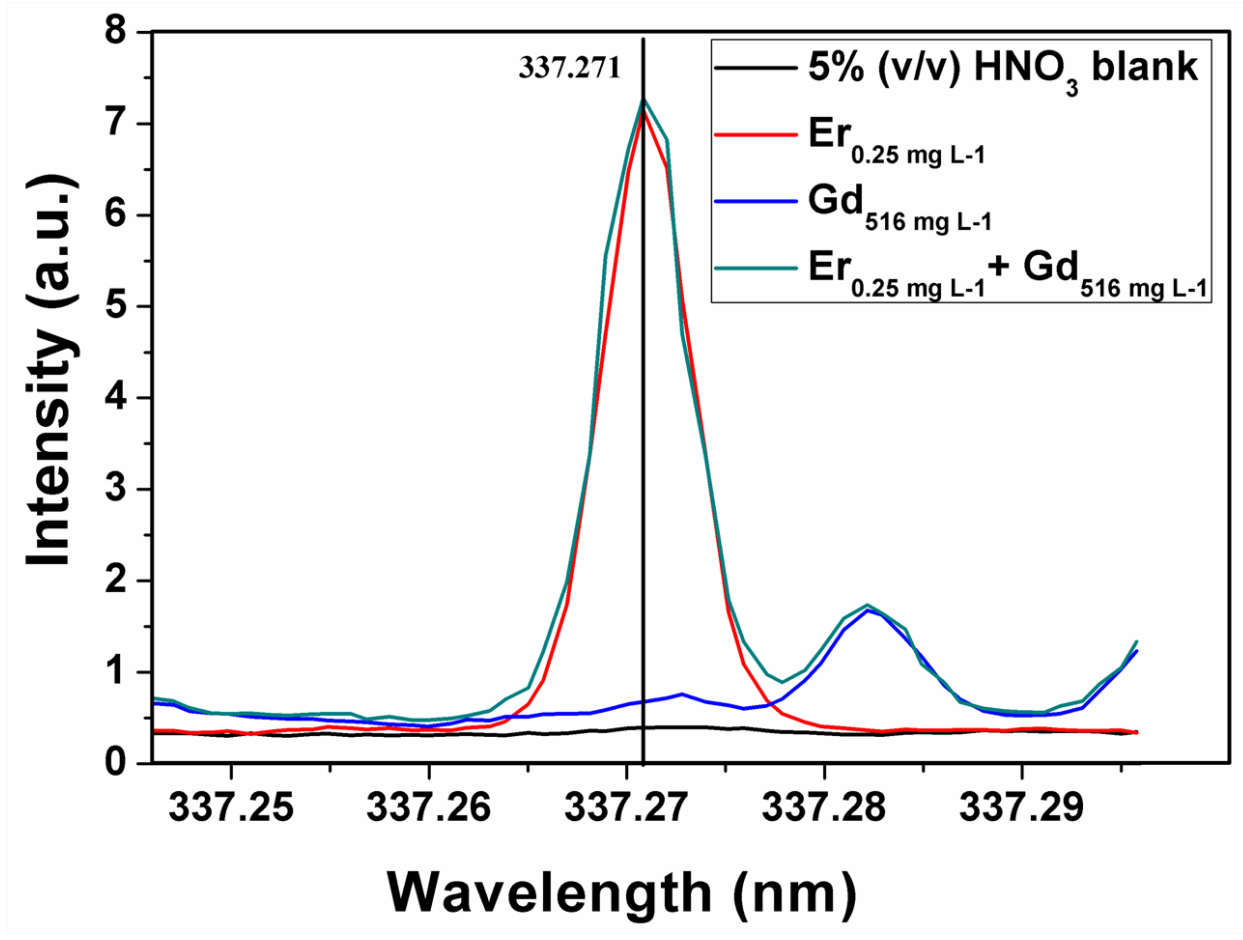

Fig. S4(j)

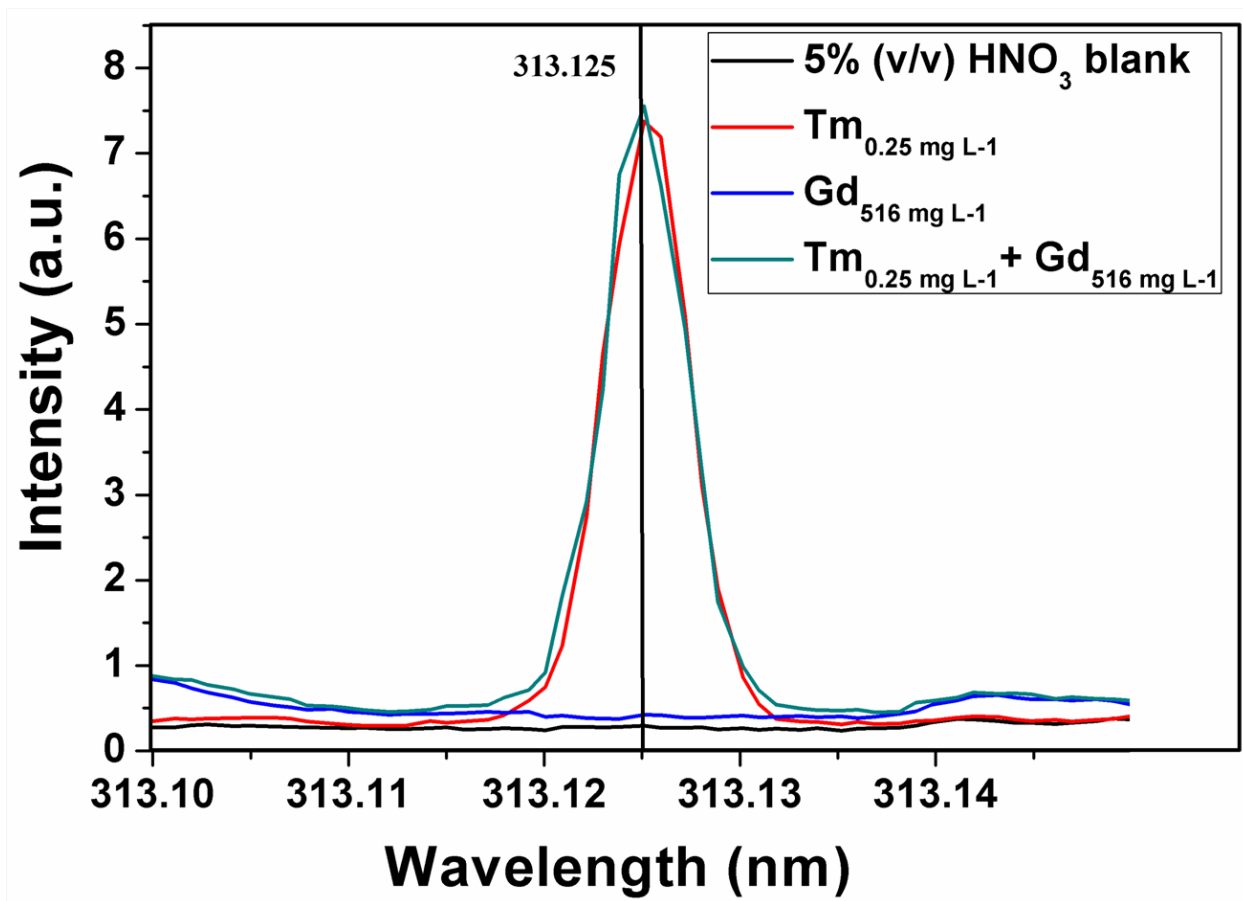

Fig. S4(k)

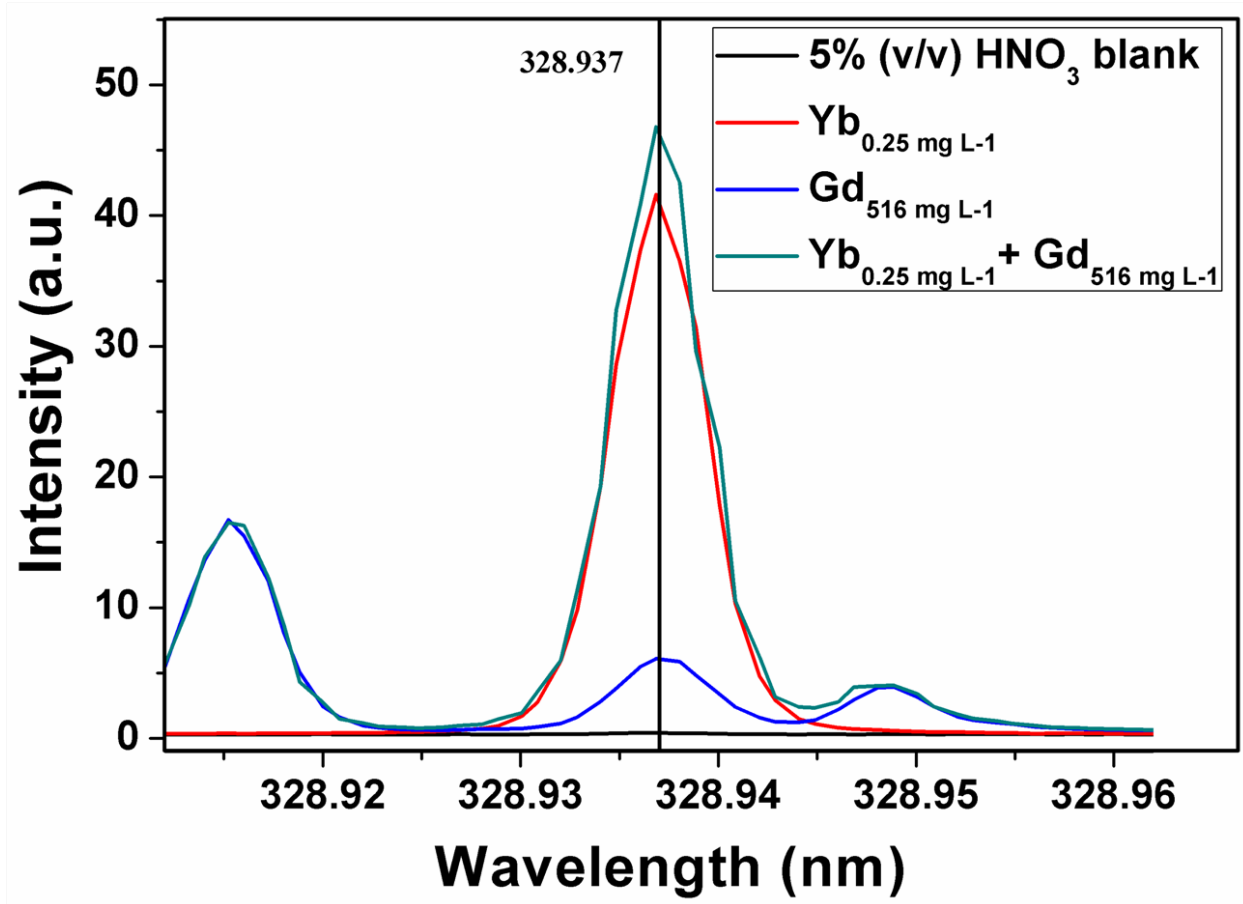

Fig. S4(l)

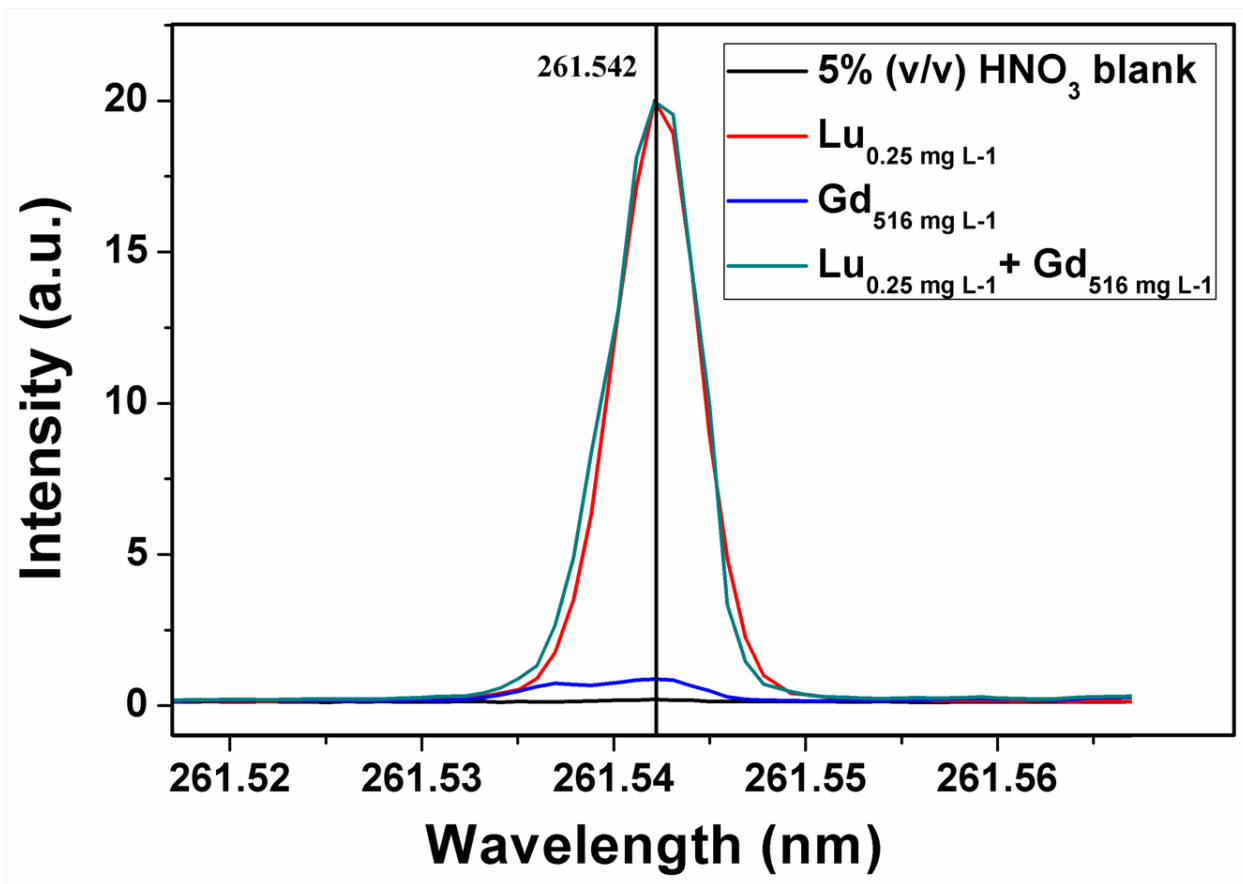

Fig. S4(m)



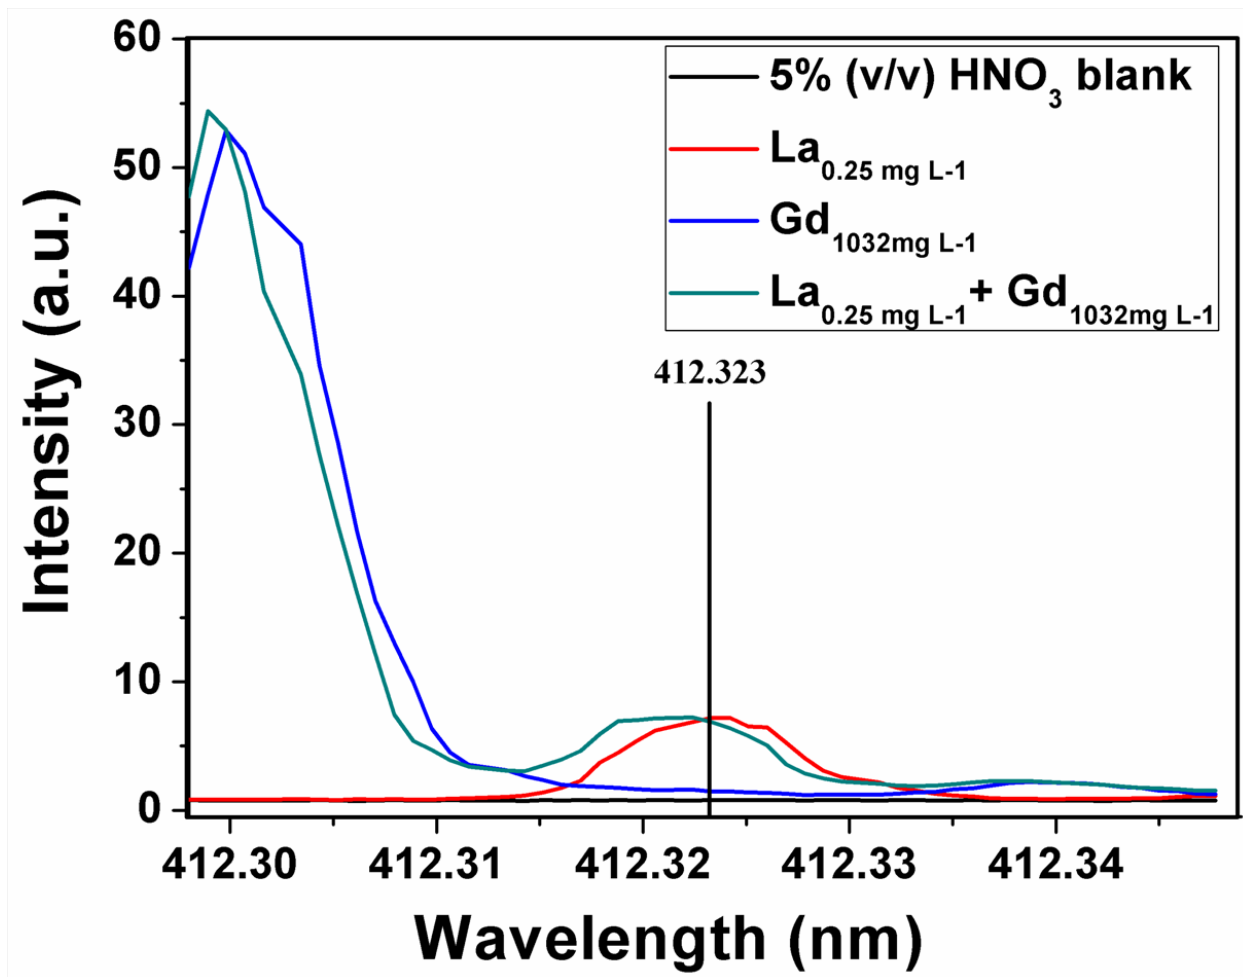

Fig. S5(a)

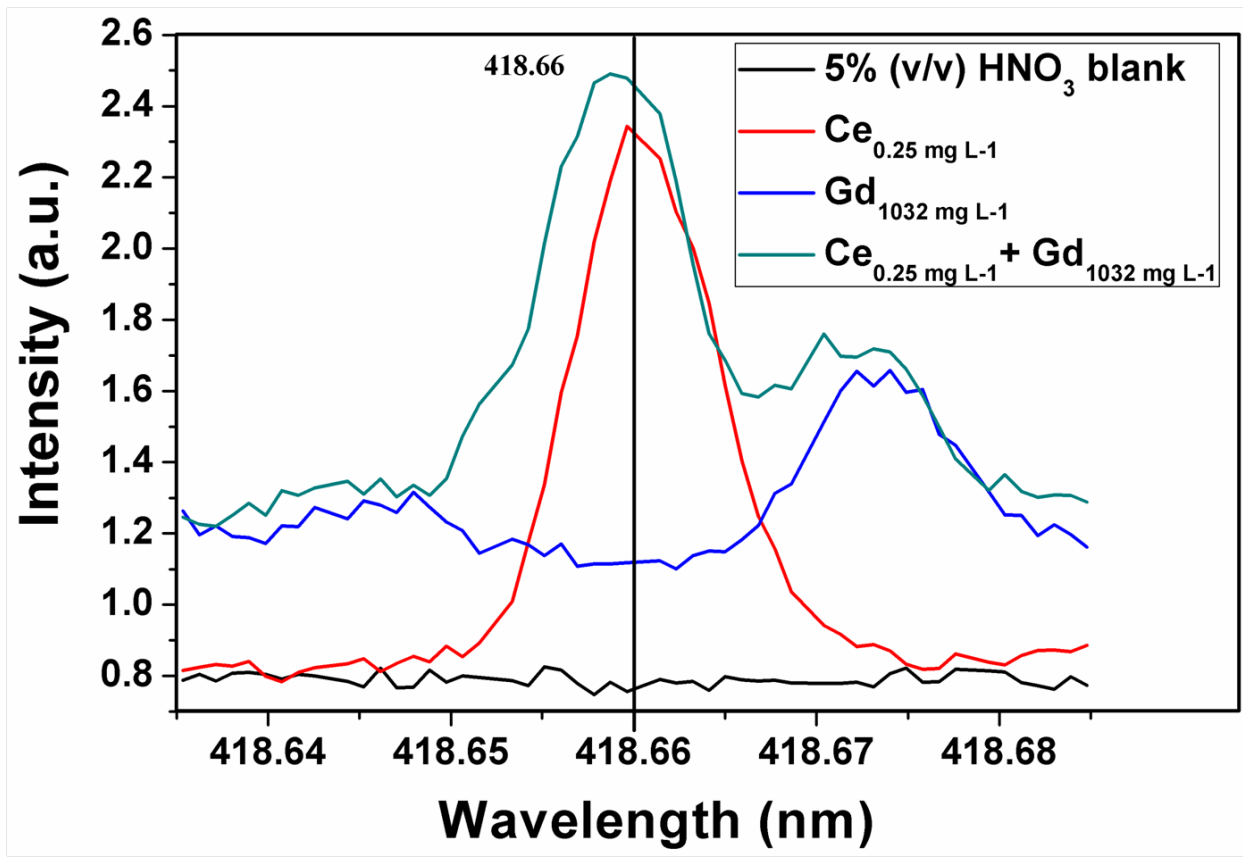

Fig. S5(b)

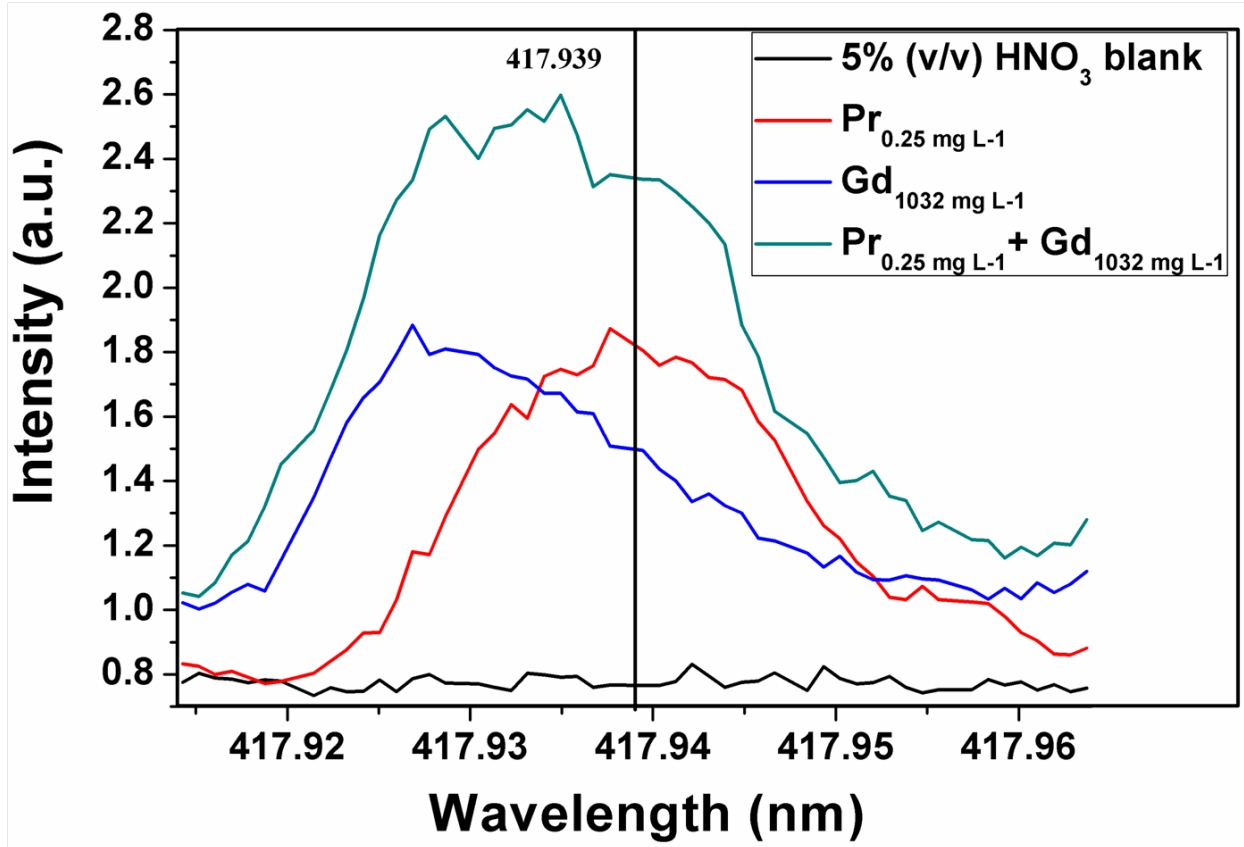

Fig. S5(c)

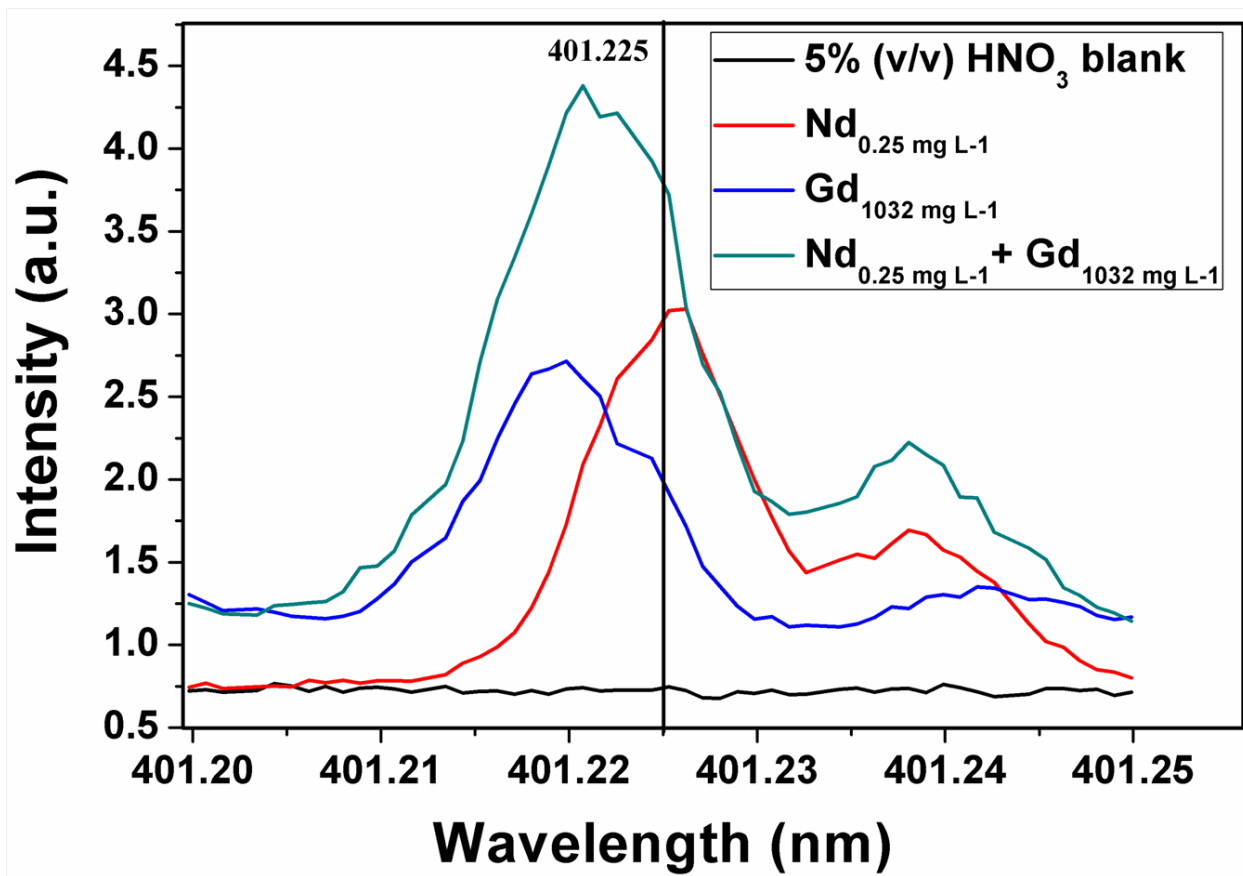

Fig. S5(d)

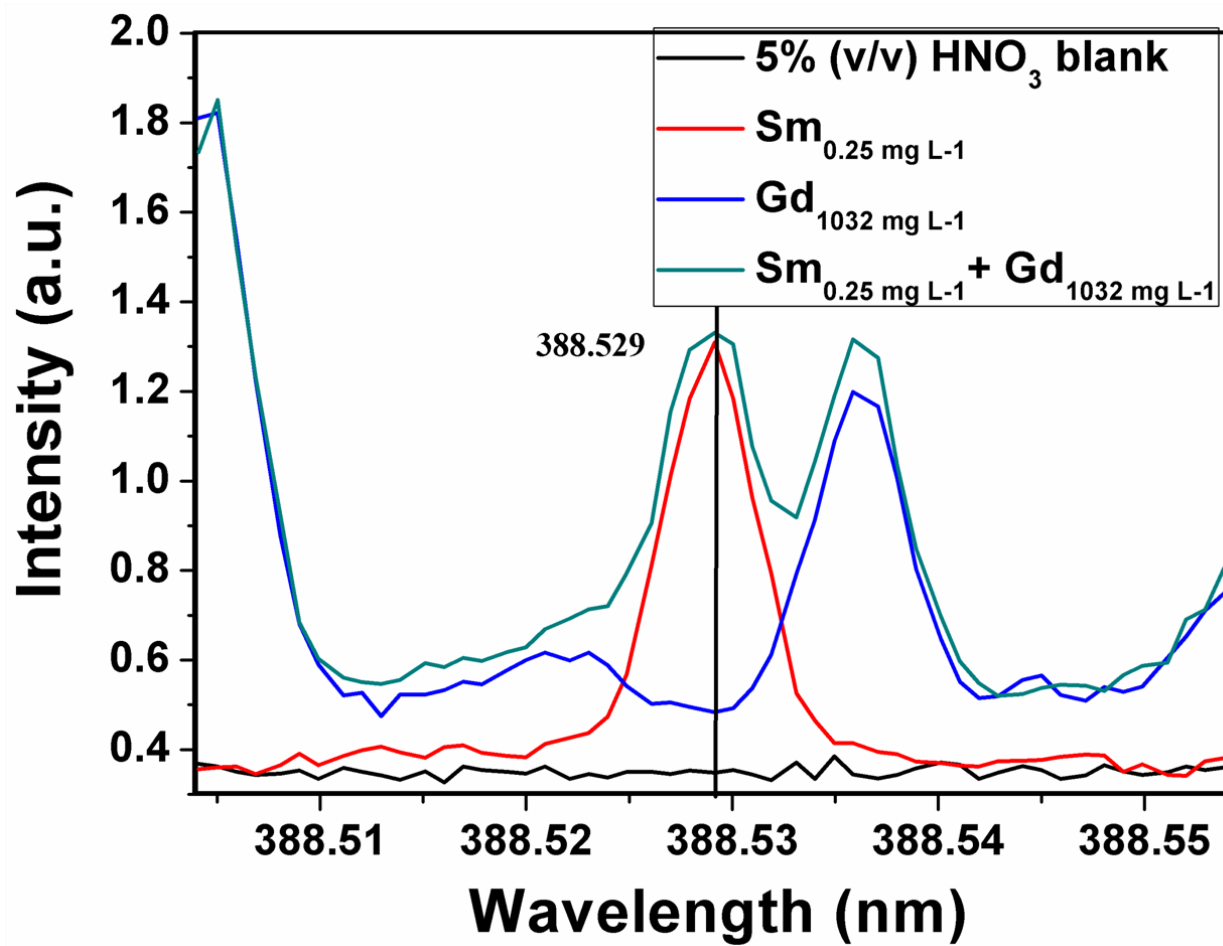

Fig. S5(e)

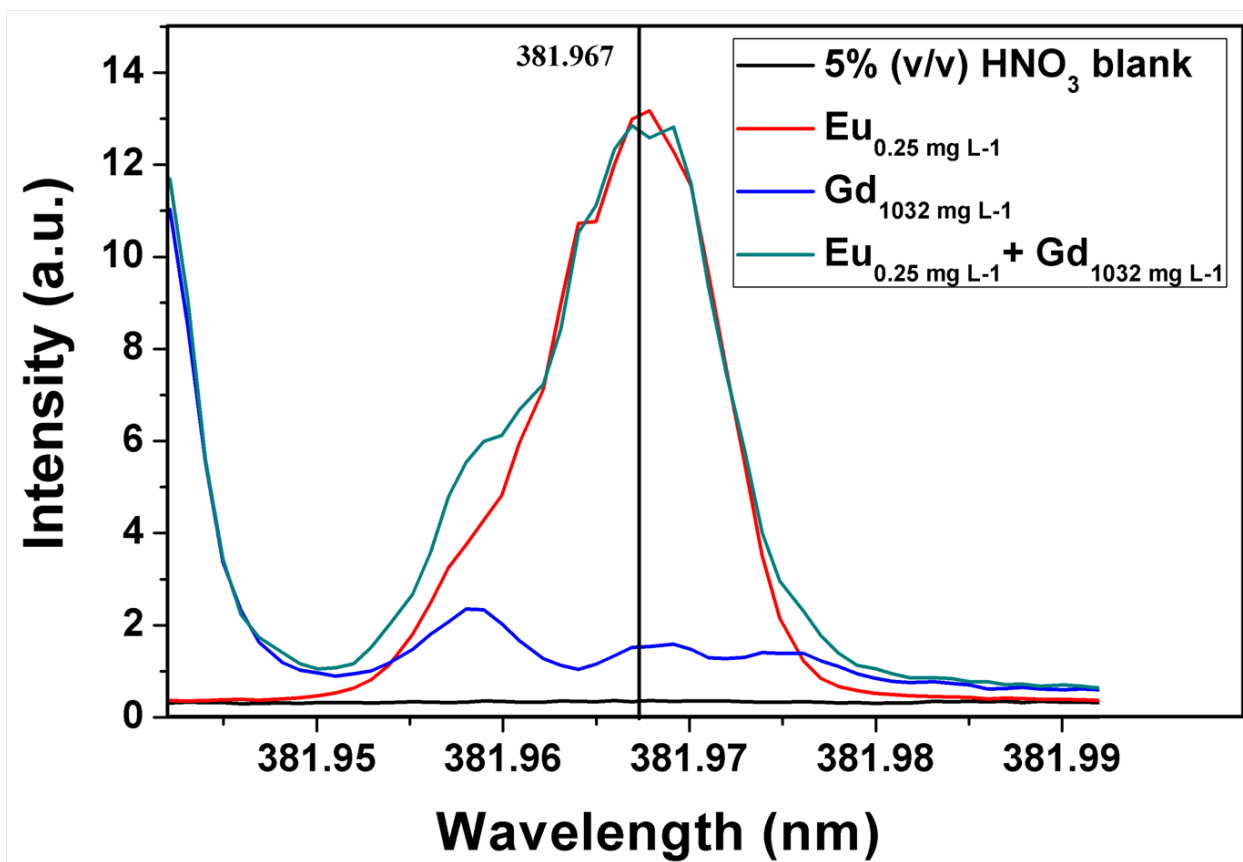

Fig. S5(f)

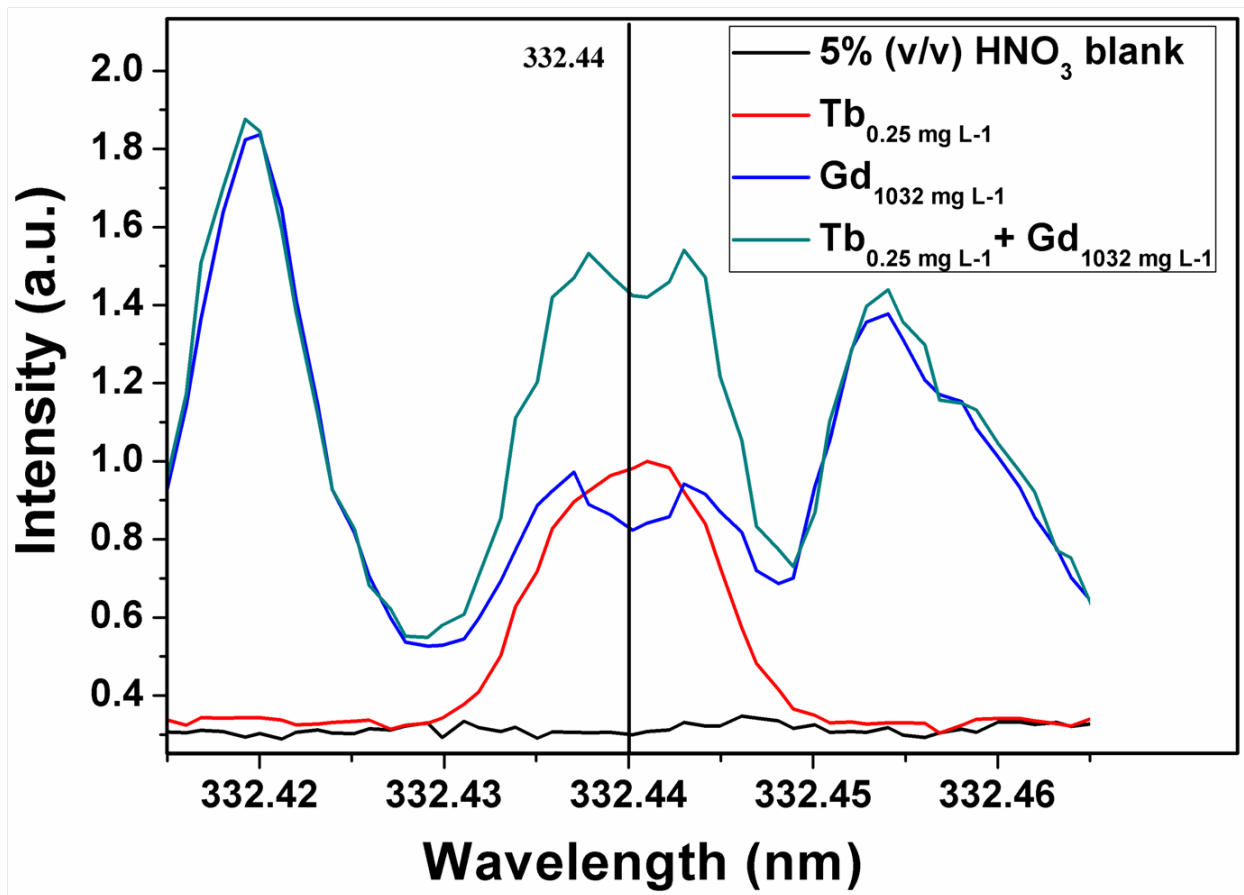

Fig. S5(g)

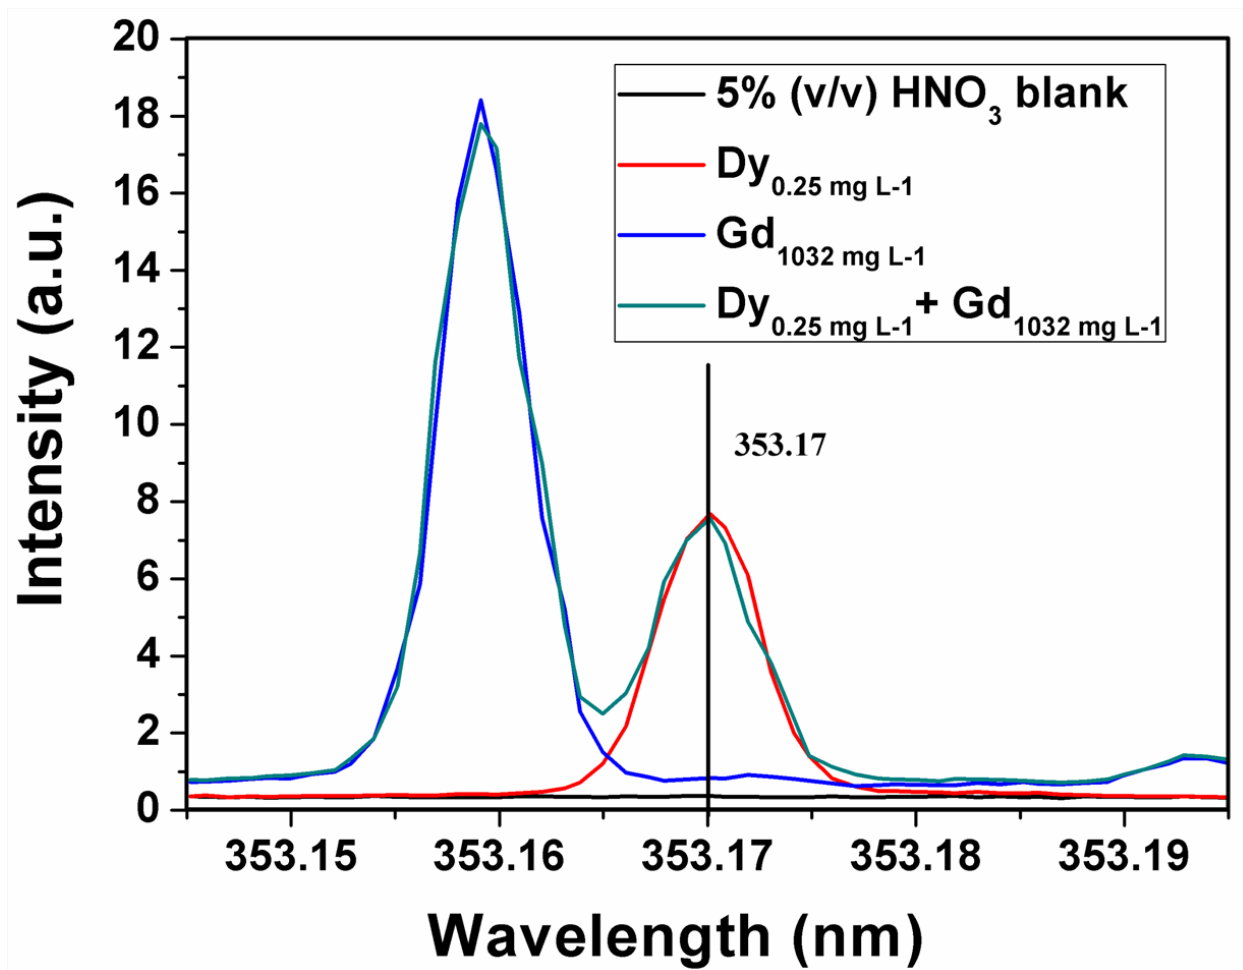

Fig. S5(h)



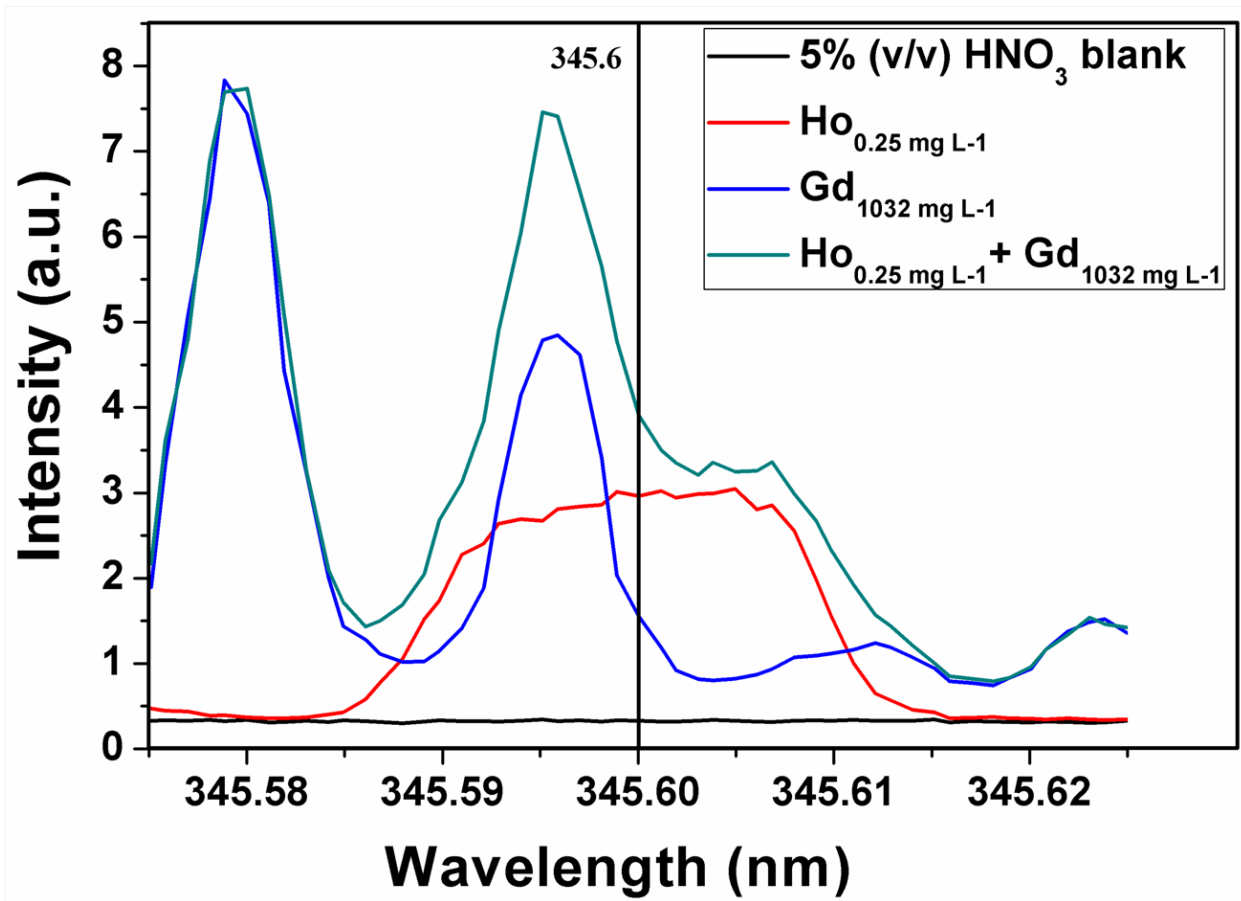

Fig. S5(i)

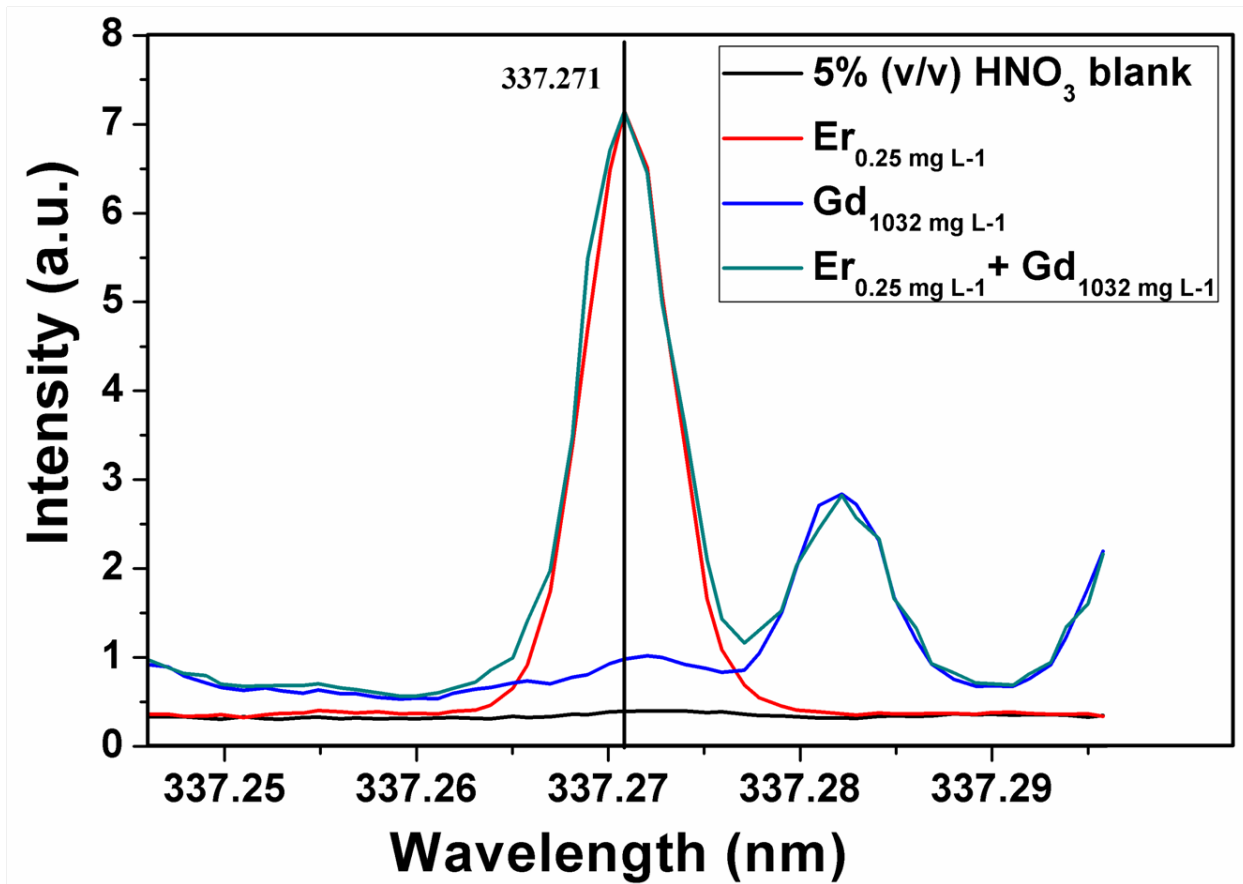

Fig. S5(j)

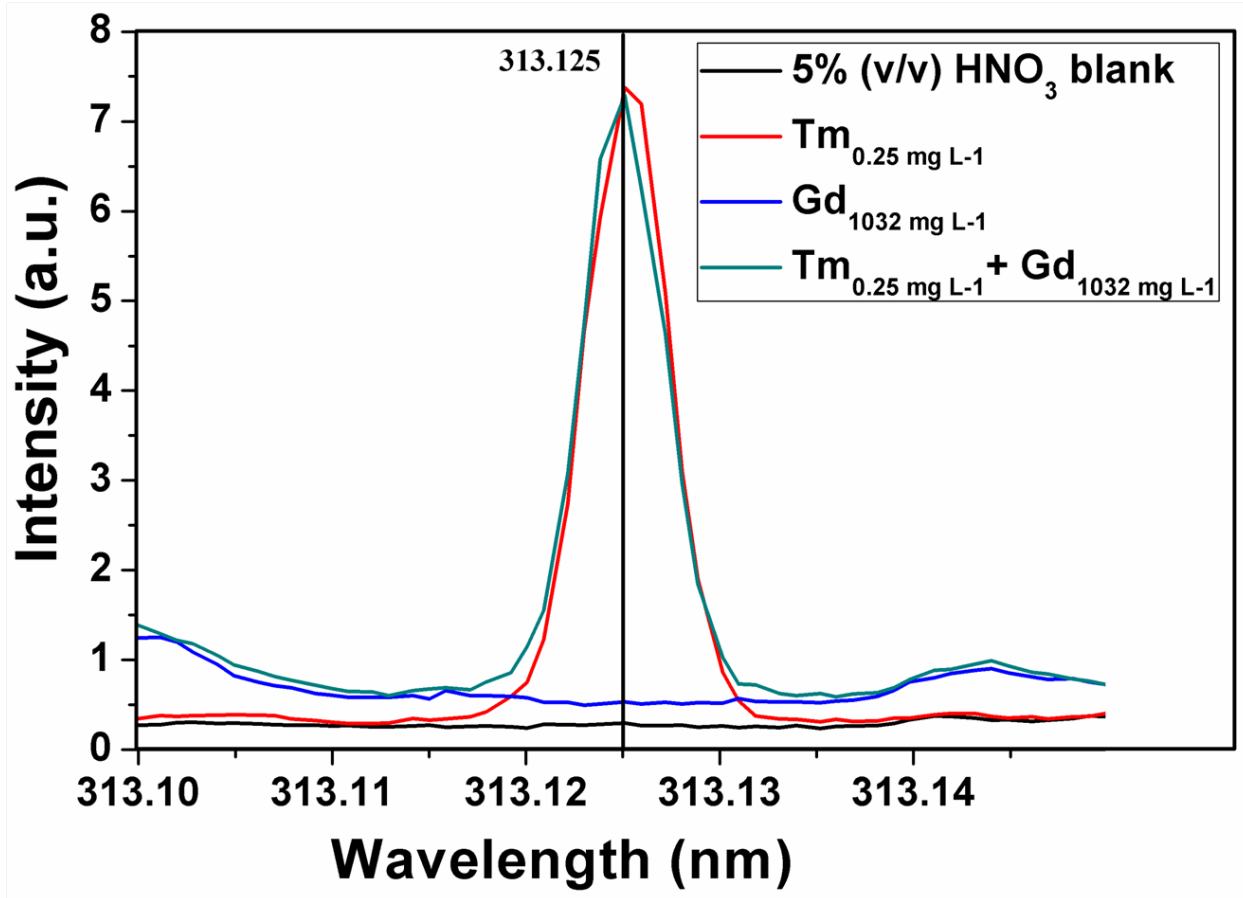

Fig. S5(k)

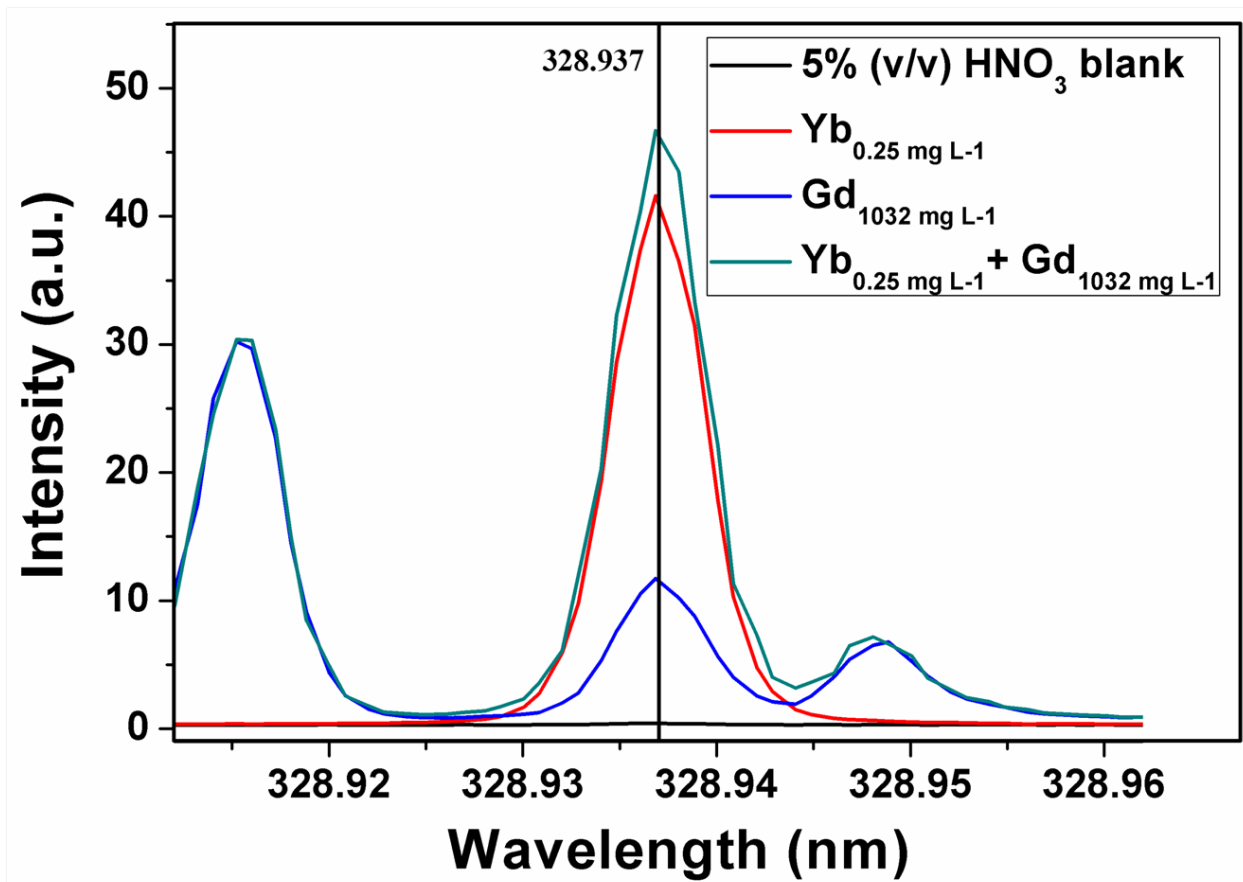

Fig. S5(l)

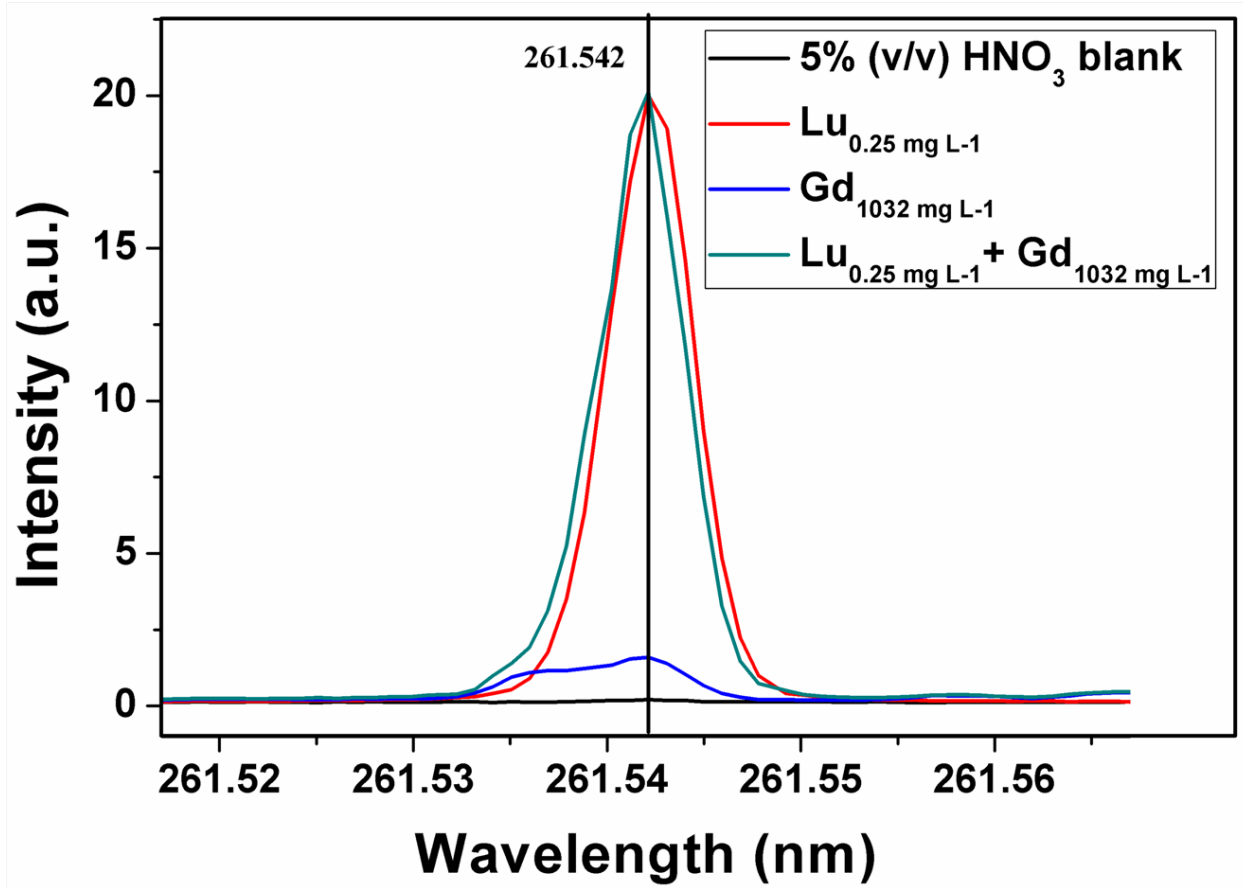

Fig. S5(m)
